# Supplementary material for: What is the impact of research champions on integrating research in mental health clinical practice? A quasiexperimental study in South London, UK
Source: PubMed Central journal article supplement — BMJ Open. 2017 Sep 11;7(9):e016107. doi: 10.1136/bmjopen-2017-016107 (PMC5595181; doi:10.1136/bmjopen-2017-016107), 2017-09-11
Supplement: bmjopen-2017-016107.draft_revisions.pdf [file bmjopen-2017-016107.draft_revisions.pdf]

# BMJ Open

BMJ Open is committed to open peer review. As part of this commitment we make the peer review history of every article we publish publicly available.

When an article is published we post the peer reviewers' comments and the authors' responses online. We also post the versions of the paper that were used during peer review. These are the versions that the peer review comments apply to.

The versions of the paper that follow are the versions that were submitted during the peer review process. They are not the versions of record or the final published versions. They should not be cited or distributed as the published version of this manuscript.

BMJ Open is an open access journal and the full, final, typeset and author-corrected version of record of the manuscript is available on our site with no access controls, subscription charges or pay-per-view fees (<http://bmjopen.bmj.com>).

If you have any questions on BMJ Open's open peer review process please email [editorial.bmjopen@bmj.com](mailto:editorial.bmjopen@bmj.com)

# BMJ Open

## Investing in clinical staff to embed research in mental health clinical services: a quasi-experimental study.

|                                 |                                                                                                                                                                                                                                                                                                                                     |
|---------------------------------|-------------------------------------------------------------------------------------------------------------------------------------------------------------------------------------------------------------------------------------------------------------------------------------------------------------------------------------|
| Journal:                        | <i>BMJ Open</i>                                                                                                                                                                                                                                                                                                                     |
| Manuscript ID                   | bmjopen-2017-016107                                                                                                                                                                                                                                                                                                                 |
| Article Type:                   | Research                                                                                                                                                                                                                                                                                                                            |
| Date Submitted by the Author:   | 26-Jan-2017                                                                                                                                                                                                                                                                                                                         |
| Complete List of Authors:       | Oduola, Sherifat; King's College London (Institute of Psychiatry), Health Service Population Research; South London and Maudsley NHS Foundation Trust, Wykes, Til; King's College London (Institute of Psychiatry), Robotham, Dan; King's College London, Psychology Craig, Thomas; King's College London (Institute of Psychiatry) |
| <b>Primary Subject Heading</b>: | Mental health                                                                                                                                                                                                                                                                                                                       |
| Secondary Subject Heading:      | Health services research                                                                                                                                                                                                                                                                                                            |
| Keywords:                       | recruitment, consent, psychosis, research participation, mental health                                                                                                                                                                                                                                                              |
|                                 |                                                                                                                                                                                                                                                                                                                                     |

SCHOLARONE™  
Manuscripts

**Title:**

Investing in clinical staff to embed research in mental health clinical services: a quasi-experimental study.

**Authors:**

Sherifat Oduola<sup>1,2</sup>, Til Wykes<sup>3</sup>, Dan Robotham<sup>3</sup>, and Tom K. J. Craig<sup>1</sup>

**Author affiliations**

1. King's College London, Department of Health Service and Population Research, Institute of Psychiatry, Psychology & Neuroscience, De Crespigny Park, Denmark Hill, London SE5 8AF, UK
2. South London and Maudsley NHS Foundation Trust, NIHR Maudsley Biomedical Research Centre Denmark Hill, London SE5 8AZ, UK
3. King's College London, Department of Psychology, Institute of Psychiatry, Psychology & Neuroscience, De Crespigny Park, Denmark Hill, London SE5 8AF, UK

**Correspondence to:**

Sherifat Oduola

Tel: +44 (0) 2078480619

Email: [Sherifat.oduola@kcl.ac.uk](mailto:Sherifat.oduola@kcl.ac.uk)

Word count (excluding abstract, references, tables and figures): 2,434

Key words: recruitment, mental health, consent, psychosis, research participation.

**Abstract**

**Objectives:** Key challenges for mental health healthcare professionals to implement research alongside clinical activity have been highlighted such as, insufficient time to apply research skills and lack of support and resources. We examined the impact of employing dedicated staff to promote research in community mental health clinical settings.

**Design:** Quasi-experiment before and after study.

1  
2  
3 **Setting:** South London and Maudsley NHS Foundation Trust (SLaM).  
4

5  
6 **Participants:** 4,455 patients receiving care from fifteen community mental health teams between 1<sup>st</sup>  
7  
8 December 2013 and 31<sup>st</sup> December 2014.  
9

10  
11 **Outcome measures:** the proportion of patients approached for research participation in clinical  
12  
13 services where research champions were present (intervention group) and comparison group where  
14  
15 there were no research champions present.  
16

17  
18 **Results:** Patients in the intervention group were nearly six times more likely to be approached for  
19  
20 research participation (Adj. OR=5.98; 95%CI= 4.96 – 7.22).  
21  
22

23  
24 **Conclusions:** Investing in staff that promote and drive research in clinical services increases  
25  
26 opportunities for patients to hear about and engage in clinical research studies. However,  
27  
28 investment needs to move beyond employing short-term staff. Ensuring that research roles and  
29  
30 responsibility are embedded in the job descriptions of all clinical staff of mental health service  
31  
32 providers would be crucial in realising the goal of making research an everyday business.  
33  
34

### 35 36 **Strengths and limitations of this study** 37

- 38
- 39
- 40 • Describes how research activity can be embedded as part of routine clinical care.
- 41
- 42 • Highlights the importance of investing in clinical staff to promote and drive research in
- 43  
44 clinical settings.
- 45
- 46 • Quasi-experimental study evaluates the relationship between service-level intervention and
- 47  
48 opportunities for patients to hear about and engage in clinical research studies.
- 49
- 50 • Lack of randomisation may have led to the introduction of bias.
- 51  
52  
53  
54  
55  
56  
57  
58  
59  
60

## Introduction

In the UK, the National Health Service (NHS) constitution promises to make research accessible to all persons using its services [1]. Yet, there are discrepancies in the level of investment and engagement in research across healthcare providers and patients [2]. Recruitment into mental health research is reported to be more challenging compared with physical health studies [3, 4]. However, the challenge is not solely related to the actual recruitment of participants as emerging evidence suggest that patients are willing to participate in research with the understanding that they have autonomy over their participation [5] and are reassured of confidentiality of their personal information [6].

A good part of the challenge rests on the practical difficulties of getting researchers to meet potential participants. Researchers have to broker meetings with busy clinicians who are relied upon to remember the details of several projects and explain these to their patients. In addition, the modern dispersed mental health service may mean the researcher juggle visits across multiple community clinic sites. The upshot is persistent, if understandable failures to recruit to target and on time [7].

In an attempt to improve existing processes, the South London and Maudsley NHS Trust (SLaM) introduced a system whereby clinical staff are expected to ask all their patients whether they might be interested in approaches from researchers for studies that could be relevant for their condition (Consent for Contact; C4C) and responses are recorded in electronic health records. These responses form a searchable register through which an investigator can identify potential participants who have given this broad consent to be contacted. The register and C4C system has been described in detail elsewhere [5, 8, 9]. Ultimately, of course, the requirement to take and record consent on patients electronic health records does nothing to address many of the underlying issues including how to balance this activity against the demands of clinical responsibility [10], insufficient time to

1  
2  
3 apply research skill [11, 12], lack of sufficient information [13, 14], lack of support from managers  
4  
5 [15] and not being recognised as a partner or not having a voice in the research process [16] .  
6  
7  
8  
9

10  
11 In this paper, we addressed the question of whether a short-term investment in dedicated teams  
12  
13 and staff can have a sustained benefit over and above the impact of implementing research as part  
14  
15 of clinical activity through the C4C programme. We assessed the usefulness of employing research  
16  
17 champions (i.e. staff with both clinical and research responsibility) a team-level intervention in  
18  
19 clinical services that focus on psychotic disorders (often regarded as particularly challenging for  
20  
21 research recruitment) could help to tackle some of these fundamental issues as reflected in C4C sign  
22  
23 up.  
24  
25  
26  
27

## 28 **Methods**

### 29 **Study design and participants**

30  
31  
32 We employed a before and after quasi-experiment design. The study was conducted in four south  
33  
34 London boroughs (Lambeth, Southwark, Croydon and Lewisham) within community mental health  
35  
36 teams serving approximately 4800 people with stable, chronic psychotic disorders at SLaM between  
37  
38 December 2013 and December 2014.  
39  
40  
41  
42

43  
44 SLaM is the largest mental health provider in the UK serving urban and suburban population in  
45  
46 south London and specialist services elsewhere in the UK [17, 18]. Clinical services for psychosis  
47  
48 serve on average 7000+ patients per year and are structured around four service lines based on  
49  
50 different stages of illness from the first episode through continuing care [18]. At the time of the  
51  
52 study, there were 15 case-management community mental health teams providing continuing care  
53  
54 for people with stable, chronic psychotic disorder in the Trust.  
55  
56  
57  
58  
59  
60

1  
2  
3 In this study and as demonstrated by Callard and colleagues [8], individuals were not recruited to  
4  
5 research studies but to a research register so that researchers can approach and invite them to  
6  
7 research studies.  
8  
9

## 10 11 12 13 **Procedure and team allocation**

### 14 15 16 **Recruitment as usual**

17 The procedures for implementing the C4C model are provided in a previous paper [8]. To support  
18  
19 the implementation, a dedicated team of clinicians and project workers referred to as 'C4C  
20  
21 implementation team' coordinated C4C activities. All teams across the trust have attended an  
22  
23 ongoing promotional campaign that raises awareness of C4C among service users and staff, including  
24  
25 posters with information about how interested patients might get involved in research and C4C. A  
26  
27 short film which describes the concept and process of C4C tailored to staff and patients is also  
28  
29 widely available via the Trust intranet page and public-facing internet. The C4C implementation  
30  
31 team also holds an annual one-day event on 20th May to acknowledge and celebrate the  
32  
33 International Clinical Trials Day (National Institute of Health Research 2014). C4C stalls are held  
34  
35 across the main hospital sites of SLaM on the day. The aims of the day are to raise awareness of the  
36  
37 importance and benefit of research, showcase some of the research studies currently running within  
38  
39 the organisation and invite service users to sign up for C4C. For the present study, community teams  
40  
41 providing services to people suffering from psychotic disorders were invited to apply for additional  
42  
43 funding in order to employ research champions to work in each borough.  
44  
45  
46  
47

48  
49 Of the four boroughs, clinical services in two (Southwark and Lewisham) took up the opportunity to  
50  
51 employ research champions in addition to C4C recruitment as usual and are referred to here as the  
52  
53 intervention group. The remaining two boroughs had recruitment as usual only and are referred to  
54  
55 as comparison group.  
56  
57  
58  
59  
60

## Intervention

The intervention involved research champions (RCs) working within clinical services specifically to discuss research participation with patients and record those who are interested (and consented) or refused onto the electronic health records. In identifying research champions a number of key essential requirements were assessed including: clinical qualification e.g. nursing, social work or occupational therapy; extensive clinical experience; broad knowledge of mental disorders and treatment models; excellent communications, computer and organisational skills. These qualities were assessed in an interview. The role involved RCs actively having conversations about research and explaining research participation (C4C) to patients and recording their response ('yes' or 'no') on the electronic health records. Two nurses were employed as RCs; they worked full time hours (37.5hrs per week) in each team of the intervention boroughs for two weeks. An average unit cost in 2013/14 of £35 per hour per RC was used [19] during the intervention period, therefore a total of £26,250 was invested in both RCs. RCs attended one day training on how to engage patients in C4C before undertaking the task of recruiting and signing up patients. They also had training in research governance particularly regarding informed consent and assessment of mental capacity to provide consent. RCs encouraged other healthcare professionals in each team to discuss research participation with patients, for example, when they visited patients at home. Subsequently, RCs provided administrative support to record patients' response onto the electronic health record. In addition RCs played the role of 'go-to- person' within the team, such that team members could direct questions or issues about research participation to them. Placement of RCs in clinical teams took place between 1st March and 30th June 2014.

## Source of data

Data were drawn from the Maudsley Biomedical Research Centre (BRC) Clinical Records Interactive Search tool (CRIS) (Stewart et al., 2009). Briefly, CRIS provides a daily updated, anonymised copy of



1  
2  
3 the Trust's electronic clinical record. The C4C model is embedded as a clinical activity and so  
4  
5 consent or refusal to join the C4C register is recorded on these electronic case records and thus  
6  
7 searchable through CRIS.  
8  
9

## 10 **Data collection and analysis**

### 11 **Inclusion criteria**

12  
13  
14 Patients were included if they were active in and receiving care from participating community  
15  
16 mental health teams at specific time points (T) as follow:  
17  
18

19  
20  
21 T1 = 3 month before intervention (1st Dec 2013)  
22

23  
24 T2 = Start of intervention (1 March 2014)  
25

26  
27 T3 = End of intervention (30 June 2014)  
28

29  
30 T4 = 3 months post intervention (30 Sep 2014)  
31

32  
33 T5 = 6 months post intervention (31 Dec 2014)  
34  
35  
36  
37

### 38 **Outcome measures**

39  
40 The primary outcome measure was the proportion of patients recorded as having been approached  
41  
42 for research participation by each time point. This measure was chosen as the primary outcome as it  
43  
44 characterises the success and uptake of C4C and it is a robust assessment of impact of the  
45  
46 intervention. From CRIS, we identified and extracted information for teams included in the study as  
47  
48 independent variables and the proportion of patients on the team caseload who were asked about  
49  
50 C4C as binary outcome variable. Socio-demographic information (gender and age) were collected at  
51  
52 patient level as covariates for logistic regression analysis.  
53  
54  
55  
56  
57  
58  
59  
60

1  
2  
3 Data were analysed using STATA version 12 [20]. Chi-squared tests were used to compare proportion  
4  
5 of C4C approaches in intervention and comparison groups by time-point. Binary logistic regression  
6  
7 models were applied to assess association between patients approached for C4C and study arm  
8  
9 (comparison vs. intervention group) with and without adjusting for demographic factors. Since our  
10  
11 primary sampling unit is the participating boroughs, the *cluster (borough)* option was  
12  
13 specified for the logistic regression models in STATA. This provides robust estimates of standard  
14  
15 errors and the approach is recommended when data is drawn from units within a population[21]  
16  
17

## 18 19 Ethical approval

20  
21 The SLaM BRC Centre Clinical Register Interactive Search System (CRIS) was approved as an  
22  
23 anonymised dataset for secondary analysis by the Oxfordshire Research Ethics Committee  
24  
25 (reference 08/H0606/71) for mental health research [17]. A local permission was obtained from a  
26  
27 service user-led oversight committee (reference CRIS- 920) which provides governance for and  
28  
29 monitor all projects conducted using the SLaM CRIS. The SLaM C4C model was reviewed and  
30  
31 approved by the National Information Governance Board for Health and Social Care (NIGB, now  
32  
33 known as Confidential Advisory Group) and Ethics and Confidential committee (reference ECC 2—  
34  
35 08/2010).  
36  
37  
38  
39  
40  
41  
42  
43

## 44 Results

### 45 46 47 Consent for contact approaches

48  
49 In total, fifteen community mental health teams participated in the study (10 in intervention  
50  
51 (n=2684); 5 in comparison (n=1771) group). A total of 4,455 patients were receiving care across the  
52  
53 teams during the study period. Mean age was 45.7 (SD=11.9) years. There were 1871 women (756 in  
54  
55 comparison and 1115 in intervention group) and 2584 men (1014 in comparison; 1570 in  
56  
57  
58  
59  
60

1  
2  
3 intervention group). Thirty-nine patients were discharged from the intervention group between T1  
4  
5 and T2.  
6

7  
8 Table 1 shows the breakdown of patients active to teams in the intervention and comparison groups  
9  
10 who are recorded as having been approached for C4C by study time-point along with 95%  
11  
12 confidence intervals (CI). There were no significant differences between intervention and  
13  
14 comparison groups before intervention (T1) and at start of intervention (T2), although the  
15  
16 intervention group were slightly ahead in approaching patients for C4C. While recruitment rose  
17  
18 across both groups, at T3, it was greatest in the intervention group as patients were nearly four  
19  
20 times more likely to be asked C4C (adj. OR=3.78; 95%CI= 2.63 – 5.45, p<0.001). The evidence was  
21  
22 stronger and sustained three months later at T4 when patients were six times more likely to be  
23  
24 asked (adj. OR= adj. OR= 5.98; 95% CI= 1.96 – 7.22, p<0.001). The association of increased likelihood  
25  
26 of being asked C4C remained robust in the intervention group at six month post intervention (adj.  
27  
28 OR=4.13, 95% CI =2.93 – 5.79, p<0.001) at T5. Figure 1 displays a graphical illustration of the  
29  
30 difference between comparison and intervention groups across the study time points.  
31  
32  
33

34  
35 Table 1 here:  
36

37  
38 Figure 1 here:  
39  
40  
41

## 42 Discussion

### 43 Main findings

44  
45  
46 The research champion intervention had a positive and sustained impact on the proportion of  
47  
48 patients asked about consent for contact compared to recruitment as usual.  
49

50  
51  
52 During the three month before the intervention, the lack for difference between our two groups  
53  
54 may reflect the previously reported challenges for clinicians to engage in research such as extra  
55  
56 burden and interruption to clinical workflow [22].  
57  
58  
59  
60

1  
2  
3 Evidence of change was demonstrated immediately after the intervention and sustained up to six  
4  
5 months later. This reflects that given the space, time and resources, research and clinical  
6  
7 responsibilities can be aligned [16, 22].  
8  
9

10 The observed growth in the comparison group overtime supports previous findings that suggest C4C  
11  
12 is an acceptable infrastructure for research recruitment [8, 9]. However, the slight drop (4%) in  
13  
14 proportion of patients approached in the intervention group at six month may hint at washout effect  
15  
16 of end of research champions placements and may reinforce the previously reported insufficient  
17  
18 resources and support to devote time to research [12, 15]. The evidence from the present study  
19  
20 suggests that implementation of research as part of clinical activity require strategies beyond raising  
21  
22 awareness, but research champion roles need to be maintained and sustained overtime.  
23  
24  
25  
26  
27  
28

### 29 **Strengths/ Limitation**

30  
31 A number of research studies have investigated factors associated with participating in consent for  
32  
33 contact [5, 6]. However, this is the first study to report on relationship between service-level  
34  
35 intervention and being approached for C4C. One of the strengths therefore is that we were able to  
36  
37 extract data on 4,455 patients at team and individual level to investigate impact of service related  
38  
39 intervention in facilitating research recruitment. Further, the availability of data on number of  
40  
41 patients approached for C4C at different time points increased our ability to detect the full impact of  
42  
43 the intervention. Although we did not carry out a cost-benefit analysis, using a nationally published  
44  
45 unit cost [19] of community based mental health nurse provides a financial implication of the  
46  
47 investment in our intervention group, which is a useful resource for investment especially in a time  
48  
49 of cost saving.  
50  
51  
52

53 A key limitation of this study is the lack of randomisation that may have led to the introduction of  
54  
55 bias. The most obvious is the possibility that the teams who took up the opportunity of additional  
56  
57  
58  
59  
60

1  
2  
3 funding were also those most interested in helping research. We have assumed that all persons  
4  
5 receiving care within the participating teams would be asked about participating in research, our  
6  
7 study may still suffer selection bias as it is likely that clinicians may have approached higher  
8  
9 functioning patients who may be more likely to attend appointments at clinics and therefore have  
10  
11 more opportunity to see the research champions. Another limitation is that we only considered  
12  
13 assessment of the intervention up to six months, therefore we have not accounted for trends over  
14  
15 longer time that may influence the effect of the intervention.  
16  
17  
18  
19

## 20 Conclusion

21 This study highlights some key issues in integrating research as part of clinical activity across mental  
22  
23 health services with implication for future development. Our results suggest that investing in  
24  
25 clinicians that promote research in clinical services increases opportunities for patients to hear  
26  
27 about and engage in clinical research studies and may be an important early step in getting systems  
28  
29 such as C4C implemented. However, investment needs to move beyond employing short-term staff.  
30  
31 Ensuring that research roles and responsibility are embedded in the core job descriptions of all  
32  
33 clinical staff of mental health service providers would be crucial in realising the goal of making  
34  
35 research an everyday business.  
36  
37  
38  
39  
40

## 41 References

- 42 1. Department of Health, *The NHS Constitution the NHS belongs to us all*, 2013, HM Crown:  
43 London.
- 44 2. Wykes, T., et al., *Mental health research priorities for Europe*. The Lancet Psychiatry, 2015.  
45 **2**(11): p. 1036-1042.
- 46 3. Patel, M.X., V. Doku, and L. Tennakoon, *Challenges in recruitment of research participants*.  
47 *Advances in Psychiatric Treatment*, 2003. **9**(3): p. 229-238.
- 48 4. Howard, L., et al., *Why is recruitment to trials difficult? An investigation into recruitment*  
49 *difficulties in an RCT of supported employment in patients with severe mental illness*.  
50 *Contemporary Clinical Trials*, 2009. **30**(1): p. 40-46.
- 51 5. Papoulias, C., et al., *Staff and service users' views on a 'Consent for Contact' research register*  
52 *within psychosis services: a qualitative study*. BMC psychiatry, 2014. **14**(1): p. 377.
- 53 6. Robotham, D., et al., *Linking a research register to clinical records in older adults' mental*  
54 *health services: a mixed-methods study*. *Alzheimer's research & therapy*, 2015. **7**(1): p. 15.
- 55 7. McDonald, A.M., et al., *What influences recruitment to randomised controlled trials? A*  
56 *review of trials funded by two UK funding agencies*. *Trials*, 2006. **7**(1): p. 1.  
57  
58  
59  
60

- 1
- 2
- 3 8. Callard, F., et al., *Developing a new model for patient recruitment in mental health services: a cohort study using Electronic Health Records*. BMJ Open, 2014. **4**(12): p. e005654.
- 4
- 5 9. Robotham, D., et al., *Consenting for contact? Linking electronic health records to a research register within psychosis services, a mixed method study*. BMC health services research, 2015. **15**(1): p. 1.
- 6
- 7
- 8 10. Borschmann, R., et al., *Influences on recruitment to randomised controlled trials in mental health settings in England: a national cross-sectional survey of researchers working for the Mental Health Research Network*. BMC medical research methodology, 2014. **14**(1): p. 1.
- 9
- 10 11. Retsas, A. and M. Nolan, *Barriers to nurses' use of research: an Australian hospital study*. International Journal of Nursing Studies, 1999. **36**(4): p. 335-343.
- 11
- 12 12. Happell, B. and T. Martin, *Changing the culture of mental health nursing: the contribution of nursing clinical development units*. Issues Ment Health Nurs, 2005. **26**(9): p. 921-33.
- 13
- 14 13. Bryar, R.M., et al., *The Yorkshire BARRIERS project: diagnostic analysis of barriers to research utilisation*. International Journal of Nursing Studies, 2003. **40**(1): p. 73-84.
- 15
- 16 14. Robotham, D., et al., *Facilitating mental health research for patients, clinicians and researchers: a mixed-method study*. BMJ open, 2016. **6**(8): p. e011127.
- 17
- 18 15. Sitzia, J., *Barriers to research utilisation: the clinical setting and nurses themselves*. Intensive and Critical Care Nursing, 2002. **18**(4): p. 230-243.
- 19
- 20 16. Hummers-Pradier, E., et al., *Simply no time? Barriers to GPs' participation in primary health care research*. Family Practice, 2008. **25**(2): p. 105-112.
- 21
- 22 17. Stewart, R., et al., *The South London and Maudsley NHS Foundation Trust Biomedical Research Centre (SLAM BRC) case register: development and descriptive data*. BMC Psychiatry, 2009. **9**: p. 51.
- 23
- 24 18. South London and Maudsley NHS Foundation Trust. *Strategic Plan 2014-19 summary*. 2014; Available from: <http://www.slam.nhs.uk/media/313512/Strategic%20Plan%202014-19.pdf>.
- 25
- 26 19. Personal Social Services Research Unit. *Unit Costs of Health and Social Care 2014* [cited 2017; Available from: <http://www.pssru.ac.uk/project-pages/unit-costs/2014/index.php>.
- 27
- 28 20. StataCorp, L., *STATA-IC (Version 12) College Station*. Texas: StatCorp LP, 2011.
- 29
- 30 21. UCLA: Statistical Consulting Group. *Analysing collrelated (clustered) data*. 2016 [cited 20.16 12.12.16]; Available from: <http://www.ats.ucla.edu/stat/stata/library/cpsu.htm>.
- 31
- 32 22. Weng, C., et al., *Using EHRs to integrate research with patient care: promises and challenges*. Journal of the American Medical Informatics Association, 2012. **19**(5): p. 684-687.
- 33
- 34
- 35
- 36
- 37
- 38
- 39
- 40
- 41
- 42
- 43
- 44
- 45
- 46
- 47
- 48
- 49
- 50
- 51
- 52
- 53
- 54
- 55
- 56
- 57
- 58
- 59
- 60

#### ACKNOWLEDGEMENTS

We would like to thank the psychosis community teams in SLAM, Mrs Caroline Morris, Mr Abdul Choudhury and Mr Bartlomiej Pliszka for their contributions to the C4C register and Mr Hitesh Shetty for advice on data extraction.

#### AUTHOR CONTRIBUTIONS

SO, DR, TC and TW conceived the study, SO analysed data and drafted the manuscript with guidance and input throughout from TC, DR, and TW. All authors offered comments and revisions.

#### COMPETING INTERESTS

None declared

1  
2  
3  
4  
5  
6  
7  
8  
9  
10  
11  
12  
13  
14  
15  
16  
17  
18  
19  
20  
21  
22  
23  
24  
25  
26  
27  
28  
29  
30  
31  
32  
33  
34  
35  
36  
37  
38  
39  
40  
41  
42  
43  
44  
45  
46  
47  
48  
49  
50  
51  
52  
53  
54  
55  
56  
57  
58  
59  
60

DATA SHARING

No additional data are available.

FUNDING

The authors would like to acknowledge the support the National Institute for Health Research (NIHR) Mental Health Biomedical Research Centre at South London and Maudsley NHS Foundation Trust. The views expressed are those of the authors and not necessarily those of the NHS, the NIHR or the Department of Health.

For peer review only

## Tables and figure

Table 1: Associations between proportions of patients asked C4C and study group

| Time points | Control                        |                          | Intervention                   |                          | Odds ratios with 95% confidence intervals |               |                                                |              |
|-------------|--------------------------------|--------------------------|--------------------------------|--------------------------|-------------------------------------------|---------------|------------------------------------------------|--------------|
|             | Number of patients on caseload | Percentage Asked C4C (%) | Number of patients on caseload | Percentage Asked C4C (%) | Unadjusted OR                             | 95% CI        | Adj. OR ( <i>adjusted for age and gender</i> ) | 95% CI       |
| T1          | 300                            | 2.7                      | 394                            | 5.1                      | 1.95                                      | 0.63 – 10.31  | 1.71                                           | 0.45 – 10.26 |
| T2          | 301                            | 5.3                      | 355                            | 6.8                      | 1.29                                      | 0.28 – 5.86   | 1.32                                           | 0.32 – 5.39  |
| T3          | 341                            | 15.2                     | 585                            | 40.3                     | 3.75                                      | 2.65 – 5.32*  | 3.78                                           | 2.63– 5.45*  |
| T4          | 392                            | 11.7                     | 657                            | 44.4                     | 6.01                                      | 4.97 – 7.28 * | 5.98                                           | 4.96 – 7.22* |
| T5          | 437                            | 13.3                     | 693                            | 39.3                     | 4.22                                      | 3.01 – 5.90 * | 4.13                                           | 2.94 – 5.79* |

C4C, consent for contact. OR, odds ratios. Adj. OR, adjusted odds ratios. CI, confidence interval. \*p<0.001



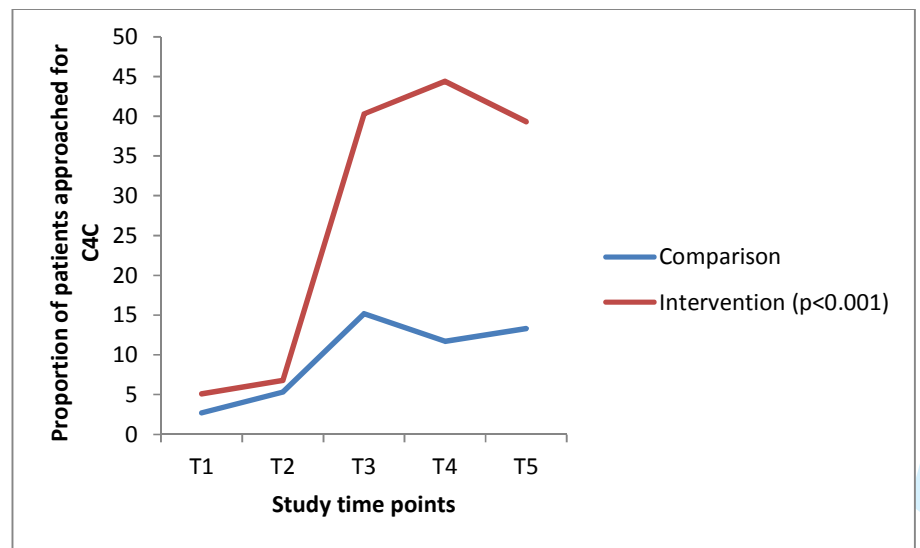

Figure 1: comparison between control and intervention group for proportion of patients asked C4C

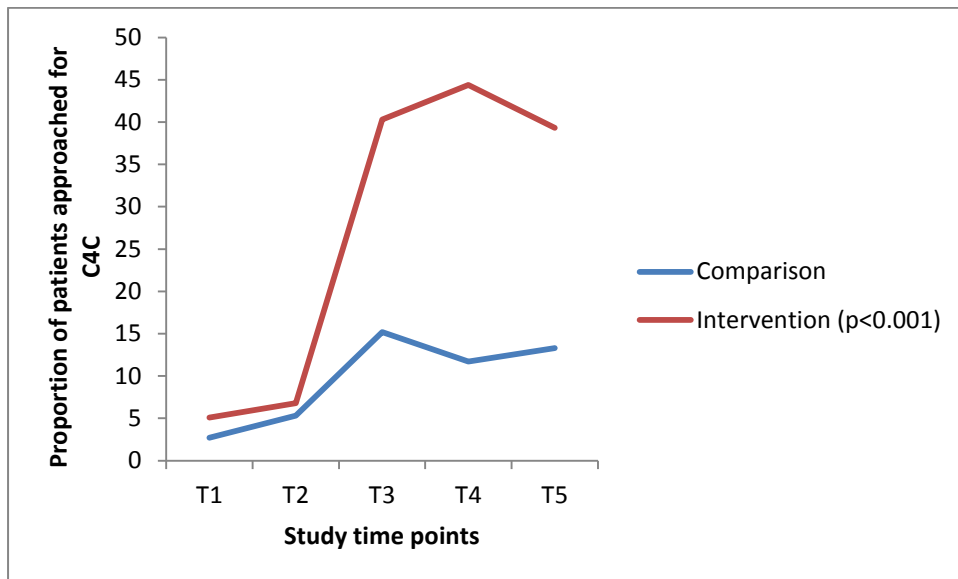

Figure 1: comparison between control and intervention group for proportion of patients asked C4C

## STROBE Statement—checklist of items that should be included in reports of observational studies

|                              | Item No | Recommendation                                                                                                                                                                                                                                                                                                                                                                                                                                                                                                                                                                                                                                                                                       | Page No. |
|------------------------------|---------|------------------------------------------------------------------------------------------------------------------------------------------------------------------------------------------------------------------------------------------------------------------------------------------------------------------------------------------------------------------------------------------------------------------------------------------------------------------------------------------------------------------------------------------------------------------------------------------------------------------------------------------------------------------------------------------------------|----------|
| <b>Title and abstract</b>    | 1       | (a) Indicate the study's design with a commonly used term in the title or the abstract<br><br>(b) Provide in the abstract an informative and balanced summary of what was done and what was found                                                                                                                                                                                                                                                                                                                                                                                                                                                                                                    | 1        |
| <b>Introduction</b>          |         |                                                                                                                                                                                                                                                                                                                                                                                                                                                                                                                                                                                                                                                                                                      |          |
| Background/rationale         | 2       | Explain the scientific background and rationale for the investigation being reported                                                                                                                                                                                                                                                                                                                                                                                                                                                                                                                                                                                                                 | 3        |
| Objectives                   | 3       | State specific objectives, including any pre specified hypotheses                                                                                                                                                                                                                                                                                                                                                                                                                                                                                                                                                                                                                                    | 4        |
| <b>Methods</b>               |         |                                                                                                                                                                                                                                                                                                                                                                                                                                                                                                                                                                                                                                                                                                      |          |
| Study design                 | 4       | Present key elements of study design early in the paper                                                                                                                                                                                                                                                                                                                                                                                                                                                                                                                                                                                                                                              | 4        |
| Setting                      | 5       | Describe the setting, locations, and relevant dates, including periods of recruitment, exposure, follow-up, and data collection                                                                                                                                                                                                                                                                                                                                                                                                                                                                                                                                                                      | 4        |
| Participants                 | 6       | (a) <i>Cohort study</i> —Give the eligibility criteria, and the sources and methods of selection of participants. Describe methods of follow-up<br><i>Case-control study</i> —Give the eligibility criteria, and the sources and methods of case ascertainment and control selection. Give the rationale for the choice of cases and controls<br><i>Cross-sectional study</i> —Give the eligibility criteria, and the sources and methods of selection of participants<br><br>(b) <i>Cohort study</i> —For matched studies, give matching criteria and number of exposed and unexposed<br><i>Case-control study</i> —For matched studies, give matching criteria and the number of controls per case | 5        |
| Variables                    | 7       | Clearly define all outcomes, exposures, predictors, potential confounders, and effect modifiers. Give diagnostic criteria, if applicable                                                                                                                                                                                                                                                                                                                                                                                                                                                                                                                                                             | 5/6      |
| Data sources/<br>measurement | 8*      | For each variable of interest, give sources of data and details of methods of assessment (measurement). Describe comparability of assessment methods if there is more than one group                                                                                                                                                                                                                                                                                                                                                                                                                                                                                                                 | 6        |
| Bias                         | 9       | Describe any efforts to address potential sources of bias                                                                                                                                                                                                                                                                                                                                                                                                                                                                                                                                                                                                                                            | 7        |
| Study size                   | 10      | Explain how the study size was arrived at                                                                                                                                                                                                                                                                                                                                                                                                                                                                                                                                                                                                                                                            | 7        |
| Quantitative<br>variables    | 11      | Explain how quantitative variables were handled in the analyses. If applicable, describe which groupings were chosen and why                                                                                                                                                                                                                                                                                                                                                                                                                                                                                                                                                                         | 8        |
| Statistical methods          | 12      | (a) Describe all statistical methods, including those used to control for confounding<br><br>(b) Describe any methods used to examine subgroups and interactions<br><br>(c) Explain how missing data were addressed<br><br>(d) <i>Cohort study</i> —If applicable, explain how loss to follow-up was addressed<br><i>Case-control study</i> —If applicable, explain how matching of cases and controls was addressed<br><i>Cross-sectional study</i> —If applicable, describe analytical methods                                                                                                                                                                                                     | 8        |

taking account of sampling strategy

(e) Describe any sensitivity analyses

Continued on next page

## Results

|                           |     |                                                                                                                                                                                                              |     |
|---------------------------|-----|--------------------------------------------------------------------------------------------------------------------------------------------------------------------------------------------------------------|-----|
| Participants              | 13* | (a) Report numbers of individuals at each stage of study—eg numbers potentially eligible, examined for eligibility, confirmed eligible, included in the study, completing follow-up, and analysed 8          | 8   |
|                           |     | (b) Give reasons for non-participation at each stage                                                                                                                                                         | 9   |
|                           |     | (c) Consider use of a flow diagram                                                                                                                                                                           |     |
| Descriptive data          | 14* | (a) Give characteristics of study participants (eg demographic, clinical, social) and information on exposures and potential confounders                                                                     | 8/9 |
|                           |     | (b) Indicate number of participants with missing data for each variable of interest                                                                                                                          | 9   |
|                           |     | (c) <i>Cohort study</i> —Summarise follow-up time (eg, average and total amount)                                                                                                                             |     |
| Outcome data              | 15* | <i>Cohort study</i> —Report numbers of outcome events or summary measures over time                                                                                                                          |     |
|                           |     | <i>Case-control study</i> —Report numbers in each exposure category, or summary measures of exposure                                                                                                         |     |
|                           |     | <i>Cross-sectional study</i> —Report numbers of outcome events or summary measures                                                                                                                           | 8/9 |
| Main results <sup>9</sup> | 16  | (a) Give unadjusted estimates and, if applicable, confounder-adjusted estimates and their precision (eg, 95% confidence interval). Make clear which confounders were adjusted for and why they were included | 14  |
|                           |     | (b) Report category boundaries when continuous variables were categorized                                                                                                                                    |     |
|                           |     | (c) If relevant, consider translating estimates of relative risk into absolute risk for a meaningful time period                                                                                             |     |
| Other analyses            | 17  | Report other analyses done—eg analyses of subgroups and interactions, and sensitivity analyses                                                                                                               |     |
| <b>Discussion</b>         |     |                                                                                                                                                                                                              |     |
| Key results               | 18  | Summarise key results with reference to study objectives                                                                                                                                                     | 9   |
| Limitations               | 19  | Discuss limitations of the study, taking into account sources of potential bias or imprecision. Discuss both direction and magnitude of any potential bias                                                   | 10  |
| Interpretation            | 20  | Give a cautious overall interpretation of results considering objectives, limitations, multiplicity of analyses, results from similar studies, and other relevant evidence                                   | 10  |
| Generalisability          | 21  | Discuss the generalisability (external validity) of the study results                                                                                                                                        | 11  |
| <b>Other information</b>  |     |                                                                                                                                                                                                              |     |
| Funding                   | 22  | Give the source of funding and the role of the funders for the present study and, if applicable, for the original study on which the present article is based                                                | 13  |

\*Give information separately for cases and controls in case-control studies and, if applicable, for exposed and unexposed groups in cohort and cross-sectional studies.

**Note:** An Explanation and Elaboration article discusses each checklist item and gives methodological background and published examples of transparent reporting. The STROBE checklist is best used in conjunction with this article (freely available on the Web sites of PLoS Medicine at <http://www.plosmedicine.org/>, Annals of Internal Medicine at <http://www.annals.org/>, and Epidemiology at <http://www.epidem.com/>). Information on the STROBE Initiative is available at [www.strobe-statement.org](http://www.strobe-statement.org).

# BMJ Open

## Estimating the impact of research champions on integrating research in mental health clinical practice: A quasi experimental study.

|                                 |                                                                                                                                                                                                                                                                                                                                              |
|---------------------------------|----------------------------------------------------------------------------------------------------------------------------------------------------------------------------------------------------------------------------------------------------------------------------------------------------------------------------------------------|
| Journal:                        | <i>BMJ Open</i>                                                                                                                                                                                                                                                                                                                              |
| Manuscript ID                   | bmjopen-2017-016107.R1                                                                                                                                                                                                                                                                                                                       |
| Article Type:                   | Research                                                                                                                                                                                                                                                                                                                                     |
| Date Submitted by the Author:   | 08-Jun-2017                                                                                                                                                                                                                                                                                                                                  |
| Complete List of Authors:       | Oduola, Sherifat; King's College London (Institute of Psychiatry), Health Service Population Research; South London and Maudsley NHS Foundation Trust,<br>Wykes, Til; King's College London (Institute of Psychiatry),<br>Robotham, Dan; King's College London, Psychology<br>Craig, Thomas; King's College London (Institute of Psychiatry) |
| <b>Primary Subject Heading</b>: | Mental health                                                                                                                                                                                                                                                                                                                                |
| Secondary Subject Heading:      | Health services research                                                                                                                                                                                                                                                                                                                     |
| Keywords:                       | recruitment, consent, psychosis, research participation, MENTAL HEALTH                                                                                                                                                                                                                                                                       |
|                                 |                                                                                                                                                                                                                                                                                                                                              |

SCHOLARONE™  
Manuscripts

**Title:**

Estimating the impact of research champions on integrating research in mental health clinical practice: A quasi experimental study.

**Authors:**

Sherifat Oduola<sup>1,2</sup>, Til Wykes<sup>3</sup>, Dan Robotham<sup>3</sup>, and Tom K. J. Craig<sup>1</sup>

**Author affiliations**

1. King's College London, Department of Health Service and Population Research, Institute of Psychiatry, Psychology & Neuroscience, De Crespigny Park, Denmark Hill, London SE5 8AF, UK
2. South London and Maudsley NHS Foundation Trust, NIHR Maudsley Biomedical Research Centre Denmark Hill, London SE5 8AZ, UK
3. King's College London, Department of Psychology, Institute of Psychiatry, Psychology & Neuroscience, De Crespigny Park, Denmark Hill, London SE5 8AF, UK

**Correspondence to:**

Sherifat Oduola

Tel: +44 (0) 2078480619

Email: [Sherifat.oduola@kcl.ac.uk](mailto:Sherifat.oduola@kcl.ac.uk)

Word count (excluding abstract, references, tables and figures): 2,523

Key words: recruitment, mental health, consent, psychosis, research participation.

**Abstract**

**Objectives:** Key challenges for mental health healthcare professionals to implement research alongside clinical activity have been highlighted, such as, insufficient time to apply research skills and lack of support and resources. We examined the impact of employing dedicated staff to promote research in community mental health clinical settings.

**Design:** Quasi-experiment before and after study.

1  
2  
3 **Setting:** South London and Maudsley NHS Foundation Trust (SLaM).  
4

5  
6 **Participants:** 4,455 patients receiving care from fifteen community mental health teams between 1<sup>st</sup>  
7  
8 December 2013 and 31<sup>st</sup> December 2014.  
9

10  
11 **Outcome measures:** The proportion of patients approached for research participation in clinical  
12  
13 services where research champions were present (intervention group) and comparison group where  
14  
15 there were no research champions present.  
16

17  
18 **Results:** Patients in the intervention group were nearly six times more likely to be approached for  
19  
20 research participation (Adj. OR=5.98; 95%CI= 4.96 – 7.22).  
21  
22

23  
24 **Conclusions:** Investing in staff that promote and drive research in clinical services increases  
25  
26 opportunities for patients to hear about and engage in clinical research studies. However,  
27  
28 investment needs to move beyond employing short-term staff.  
29

### 30 31 32 **Strengths and limitations of this study** 33

- 34  
35 • Describes how research activity can be embedded as part of routine clinical care.
- 36  
37 • Highlights the importance of investing in clinical staff to promote and drive research in  
38  
39 clinical settings.
- 40  
41 • Quasi-experimental study evaluates the relationship between service-level intervention and  
42  
43 opportunities for patients to hear about and engage in clinical research studies.
- 44  
45 • Lack of randomisation may have led to the introduction of bias.  
46  
47  
48

### 49 50 **Introduction** 51

52  
53 In the UK, the National Health Service (NHS) constitution promises to make research accessible to all  
54  
55 persons using its services [1]. Yet, there are discrepancies in the level of investment and engagement  
56  
57 in research across healthcare providers and patients [2]. Recruitment into mental health research is  
58  
59

1  
2  
3 reported to be more challenging compared with physical health studies [3, 4]. However, the  
4  
5 challenge is not solely related to the actual recruitment of participants as emerging evidence suggest  
6  
7 that patients are willing to participate in research with the understanding that they have autonomy  
8  
9 over their participation [5] and are reassured of confidentiality of their personal information [6].  
10

11  
12 A good part of the challenge rests on the practical difficulties of getting researchers to meet  
13  
14 potential participants. Researchers have to broker meetings with busy clinicians who are relied upon  
15  
16 to remember the details of several projects and explain these to their patients. In addition, the  
17  
18 modern dispersed mental health service may mean the researcher juggle visits across multiple  
19  
20 community clinic sites. The upshot is persistent, if understandable failures to recruit to target and on  
21  
22 time [7, 8].  
23  
24  
25  
26  
27  
28

29 In an attempt to improve existing processes, the South London and Maudsley NHS Trust (SLaM)  
30  
31 introduced a system whereby clinical staff are expected to ask all their patients whether they might  
32  
33 be interested in approaches from researchers for studies that could be relevant for their condition  
34  
35 (Consent for Contact; C4C) and responses are recorded in electronic health records. These responses  
36  
37 form a searchable register through which an investigator can identify potential participants who  
38  
39 have given this broad consent to be contacted. The register and C4C system has been described in  
40  
41 detail elsewhere [5, 9, 10]. Ultimately, of course, the requirement to take and record consent on  
42  
43 patients electronic health records does nothing to address many of the underlying issues including  
44  
45 how to balance this activity against the demands of clinical responsibility [11], insufficient time to  
46  
47 apply research skill [12, 13], lack of sufficient information [14, 15], lack of support from managers  
48  
49 [16] and not being recognised as a partner or not having a voice in the research process [17].  
50  
51  
52  
53  
54  
55  
56  
57  
58  
59  
60



1  
2  
3 In this paper, we addressed the question of whether a short-term investment in dedicated teams  
4 and staff can have a sustained benefit over and above the impact of implementing research as part  
5 of clinical activity through the C4C programme. We assessed the usefulness of employing research  
6 champions (i.e. staff with both clinical and research responsibility). A team-level intervention in  
7 clinical services that focus on psychotic disorders (often regarded as particularly challenging for  
8 research recruitment) could help to tackle some of these fundamental issues as reflected in C4C sign  
9 up.  
10  
11  
12  
13  
14  
15  
16  
17  
18  
19

## 20 **Methods**

### 21 **Study design and participants**

22  
23  
24 We employed a before and after quasi-experiment design. The study was conducted in four south  
25 London boroughs (Lambeth, Southwark, Croydon and Lewisham) within community mental health  
26 teams serving approximately 4800 people with stable, chronic psychotic disorders at SLaM between  
27 December 2013 and December 2014.  
28  
29  
30  
31  
32  
33  
34

35 SLaM is the largest mental health provider in the UK serving urban and suburban population in  
36 south London and specialist services elsewhere in the UK [18, 19]. Clinical services for psychosis  
37 serve on average 7000+ patients per year and are structured around four service lines based on  
38 different stages of illness from the first episode through continuing care [19]. At the time of the  
39 study, there were 15 case-management community mental health teams providing continuing care  
40 for people with stable, chronic psychotic disorder in the Trust.  
41  
42  
43  
44  
45  
46  
47  
48

49 In this study and as demonstrated by Callard and colleagues [9], individuals were recruited to a  
50 research register so that researchers can invite them to research studies.  
51  
52  
53  
54  
55  
56  
57  
58  
59  
60

## Procedure and team allocation

### Recruitment as usual

The procedures for implementing the C4C model are provided in a previous paper [9]. To support the implementation, a dedicated team of clinicians and project workers referred to as 'C4C implementation team' coordinated C4C activities. All teams across the trust have attended an ongoing promotional campaign that raises awareness of C4C among service users and staff, including posters with information about how interested patients might get involved in research and C4C. A short film which describes the concept and process of C4C tailored to staff and patients is also widely available via the Trust intranet page and public-facing internet. The C4C implementation team also holds an annual one-day event on 20th May to acknowledge and celebrate the International Clinical Trials Day (National Institute of Health Research 2014). C4C stalls are held across the main hospital sites of SLaM on the day. The aims of the day are to raise awareness of the importance and benefit of research, showcase some of the research studies currently running within the organisation and invite service users to sign up for C4C. Patients' agreement (or refusal) to join the C4C register is primarily sought by their clinicians as part of routine clinical contacts. Patients' responses are recorded electronically in their electronic health records (EHR).

For the present study, community teams providing services to people suffering from psychotic disorders were invited to apply for additional funding in order to employ research champions to work in each borough.

Of the four boroughs, clinical services in two boroughs (Southwark and Lewisham) took up the opportunity to employ research champions in addition to C4C recruitment as usual and are referred to here as the intervention group. The remaining two boroughs had C4C recruitment as usual only and are referred to as comparison group.

## Intervention

The intervention involved research champions (RCs) working within clinical services specifically to discuss research participation with patients and record those who are interested (and consented) or refused onto the (EHR). There were ten clinical teams in the intervention group. The RCs role was advertised internally across the intervention teams as a secondment opportunity. In identifying the RCs, a number of key essential requirements were assessed including: clinical qualification e.g. nursing, social work or occupational therapy; extensive clinical experience; broad knowledge of mental disorders and treatment models; excellent communications, computer and organisational skills. These qualities were assessed in an interview. Two nurses were employed as RCs; they were allocated to spend two weeks in each intervention team at 37.5hrs per week. An average unit cost of £35 per hour for the year 2013/14 was used to estimate the cost per RC [20] during the intervention period, therefore a total of £26,250 was invested in both RCs. RCs attended one day training on how to engage patients in C4C before undertaking the task of recruiting and signing up patients. They also had training in research governance particularly regarding informed consent and assessment of mental capacity to provide consent. RCs were supervised by the clinical team leaders and C4C project manager during their allocation to each intervention team.

The role of RCs involved actively having conversations about research and explaining research participation (C4C) to patients and recording their response ('yes' or 'no') in the electronic health records. RCs also encouraged other healthcare professionals in each team to discuss research participation with patients, for example, when they visited patients at home. Consent or refusal was recorded in patients EHRs by RCs and clinicians in the teams. In addition, RCs played the role of 'go-to- person' within the teams, such that team members could direct questions or issues about research participation to them. Placement of RCs in the intervention teams took place between 1st March and 30th June 2014.

## Source of data

Data were drawn from the Maudsley Biomedical Research Centre (BRC) Clinical Records Interactive Search tool (CRIS) (Stewart et al., 2009). Briefly, CRIS provides a daily updated, anonymised copy of the Trust's electronic clinical record. The C4C model is embedded as a clinical activity and so consent or refusal to join the C4C register is recorded on these electronic case records and thus searchable through CRIS.

## Data collection and analysis

### Inclusion criteria

Patients were included if they were active in and receiving care from participating community mental health teams at specific time points (T) as follow:

T1 = 3 month before intervention (1st Dec 2013)

T2 = Start of intervention (1 March 2014)

T3 = End of intervention (30 June 2014)

T4 = 3 months post intervention (30 Sep 2014)

T5 = 6 months post intervention (31 Dec 2014)

### Outcome measures

The primary outcome measure was the proportion of patients recorded as having been approached for research participation at each time point. This measure was chosen as the primary outcome as it characterises the success and uptake of C4C and it is a robust assessment of impact of the intervention. Furthermore, a number of previous studies have also used the proportion of C4C approaches as primary outcome measure [15, 21]. From CRIS, we identified and extracted

1  
2  
3 information for teams included in the study as independent variables and the proportion of patients  
4  
5 on the team caseload who were asked about C4C as binary outcome variable. Socio-demographic  
6  
7 information (gender and age) were collected at patient level as covariates for logistic regression  
8  
9 analysis.

10  
11  
12 Data were analysed using STATA version 12 [22]. Chi-squared tests were used to compare proportion  
13  
14 of C4C approaches in intervention and comparison groups by time-point. Binary logistic regression  
15  
16 models were applied to assess association between patients approached for C4C and study arm  
17  
18 (comparison vs. intervention group) with and without adjusting for demographic factors. Since our  
19  
20 primary sampling unit was the participating teams, the *cluster (team)* option was specified for  
21  
22 the logistic regression models in STATA. This provides robust estimates of standard errors and the  
23  
24 approach is recommended when data is drawn from units within a population[23]  
25  
26

### 27 28 **Ethical approval**

29  
30 The SLaM BRC Clinical Register Interactive Search System (CRIS) was approved as an anonymised  
31  
32 dataset for secondary analysis by the Oxfordshire Research Ethics Committee (reference  
33  
34 08/H0606/71) for mental health research [18]. A local permission was obtained from a service user-  
35  
36 led oversight committee (reference CRIS- 920) which provides governance for and monitor all  
37  
38 projects conducted using the SLaM CRIS. The SLaM C4C model was reviewed and approved by the  
39  
40 National Information Governance Board for Health and Social Care (NIGB, now known as  
41  
42 Confidential Advisory Group) and Ethics and Confidential committee (reference ECC 2—08/2010).  
43  
44  
45  
46  
47  
48  
49  
50  
51  
52  
53  
54  
55  
56  
57  
58  
59  
60

## Results

### Consent for contact approaches

In total, fifteen community mental health teams participated in the study (10 in intervention (n=2684); 5 in comparison (n=1771) group). A total of 4,455 patients were receiving care across the teams during the study period. Mean age was 45.7 (SD=11.9) years. There were 1871 women (756 in comparison and 1115 in intervention group) and 2584 men (1014 in comparison; 1570 in intervention group). Thirty-nine patients were discharged from the intervention group between T1 and T2. There were no recorded patient discharges in the comparison group during the study period.

[Insert Table 1 and Figure 1]

Table 1 shows the breakdown of patients active to teams in the intervention and comparison groups who are recorded as having been approached for C4C by study time-point along with 95% confidence intervals (CI). There were no significant differences between intervention and comparison groups before intervention (T1) and at start of intervention (T2), although the intervention group were slightly ahead in approaching patients for C4C. While recruitment rose across both groups, at T3, it was greatest in the intervention group as patients were nearly four times more likely to be asked C4C (adj. OR=3.78; 95%CI= 2.63 – 5.45, p<0.001). The evidence was stronger and sustained three months later at T4 when patients were six times more likely to be asked (adj. OR= adj. OR= 5.98; 95% CI= 1.96 – 7.22, p<0.001). The association of increased likelihood of being asked C4C remained robust in the intervention group at six month post intervention (adj. OR=4.13, 95% CI =2.93 – 5.79, p<0.001) at T5. Figure 1 displays a graphical illustration of the difference between comparison and intervention groups across the study time points.

## Discussion

### Main findings

The research champion intervention had a positive and sustained impact on the proportion of patients asked about consent for contact compared to recruitment as usual.

During the three month before the intervention, the lack for difference between our two groups suggests that there were no substantial differences in the C4C activity prior to the recruitment of research champions.

Evidence of change was demonstrated immediately after the intervention and sustained up to six months later. This reflects that given the space, time and resources, research and clinical responsibilities can be aligned [17, 24].

The observed growth in the comparison group overtime supports previous findings that suggest C4C is an acceptable infrastructure for research recruitment [9, 10]. However, the slight drop (4%) in proportion of patients approached in the intervention group at six month may hint at washout effect of end of research champions' placement. This may reinforce the previously reported insufficient resources and support to devote time to research [13, 16]. The evidence from the present study suggests that implementation of research as part of clinical activity requires strategies beyond raising awareness.

### Strengths/ Limitation

A number of research studies have investigated factors associated with participating in consent for contact [5, 6]. However, this is the first study to report on relationship between service-level intervention and being approached for C4C. One of the strengths therefore, is that we were able to extract data on 4,455 patients at team and individual level to investigate impact of service related intervention in facilitating research recruitment. Further, the availability of data on number of patients approached for C4C at different time points increased our ability to detect the full impact of

1  
2  
3 the intervention. Although we did not carry out a cost-benefit analysis, using a nationally published  
4  
5 unit cost [20] of community based mental health nurse provides a financial implication of the  
6  
7 investment in our intervention group, which is a useful resource for investment especially in a time  
8  
9 of cost saving. In addition, our finding of increased proportion of patients approached for C4C in the  
10  
11 intervention group is consistent with previous studies [21, 25]  
12

13  
14 A key limitation of this study is the lack of randomisation that may have led to the introduction of  
15  
16 bias. The most obvious is the possibility that the teams who took up the opportunity of additional  
17  
18 funding were also those most interested in helping research. We have assumed that all persons  
19  
20 receiving care within the participating teams would be asked about participating in research, our  
21  
22 study may still suffer selection bias as it is likely that clinicians may have approached higher  
23  
24 functioning patients who may be more likely to attend appointments at clinics and therefore have  
25  
26 more opportunity to see the research champions. Another limitation is that we only considered  
27  
28 assessment of the intervention up to six months, therefore we have not accounted for trends over  
29  
30 longer time that may influence the effect of the intervention.  
31  
32  
33  
34  
35

## 36 Conclusion

37 This study highlights some key issues in integrating research as part of clinical activity across mental  
38  
39 health services with implication for future development. Our results suggest that investing in  
40  
41 clinicians that promote research in clinical services increases opportunities for patients to hear  
42  
43 about and engage in clinical research studies and may be an important early step in getting systems  
44  
45 such as C4C implemented. However, investment needs to move beyond employing short-term staff.  
46  
47  
48  
49

## 50 References

- 51 1. Department of Health, *The NHS Constitution the NHS belongs to us all*. 2013, HM Crown:  
52 London.
- 53 2. Wykes, T., et al., *Mental health research priorities for Europe*. The Lancet Psychiatry, 2015.  
54 **2**(11): p. 1036-1042.
- 55 3. Patel, M.X., V. Doku, and L. Tennakoon, *Challenges in recruitment of research participants*.  
56 *Advances in Psychiatric Treatment*, 2003. **9**(3): p. 229-238.  
57  
58  
59  
60



- 1
- 2
- 3
4. Howard, L., et al., *Why is recruitment to trials difficult? An investigation into recruitment difficulties in an RCT of supported employment in patients with severe mental illness.* Contemporary Clinical Trials, 2009. **30**(1): p. 40-46.
5. Papoulias, C., et al., *Staff and service users' views on a 'Consent for Contact' research register within psychosis services: a qualitative study.* BMC psychiatry, 2014. **14**(1): p. 377.
6. Robotham, D., et al., *Linking a research register to clinical records in older adults' mental health services: a mixed-methods study.* Alzheimer's research & therapy, 2015. **7**(1): p. 15.
7. McDonald, A.M., et al., *What influences recruitment to randomised controlled trials? A review of trials funded by two UK funding agencies.* Trials, 2006. **7**(1): p. 1.
8. NIHR Clinical Research Network. *Our Performance.* 2017; Available from: <https://www.nihr.ac.uk/about-us/how-we-are-managed/managing-centres/crn/our-performance.htm>.
9. Callard, F., et al., *Developing a new model for patient recruitment in mental health services: a cohort study using Electronic Health Records.* BMJ Open, 2014. **4**(12): p. e005654.
10. Robotham, D., et al., *Consenting for contact? Linking electronic health records to a research register within psychosis services, a mixed method study.* BMC health services research, 2015. **15**(1): p. 1.
11. Borschmann, R., et al., *Influences on recruitment to randomised controlled trials in mental health settings in England: a national cross-sectional survey of researchers working for the Mental Health Research Network.* BMC medical research methodology, 2014. **14**(1): p. 1.
12. Retsas, A. and M. Nolan, *Barriers to nurses' use of research: an Australian hospital study.* International Journal of Nursing Studies, 1999. **36**(4): p. 335-343.
13. Happell, B. and T. Martin, *Changing the culture of mental health nursing: the contribution of nursing clinical development units.* Issues Ment Health Nurs, 2005. **26**(9): p. 921-33.
14. Bryar, R.M., et al., *The Yorkshire BARRIERS project: diagnostic analysis of barriers to research utilisation.* International Journal of Nursing Studies, 2003. **40**(1): p. 73-84.
15. Robotham, D., et al., *Facilitating mental health research for patients, clinicians and researchers: a mixed-method study.* BMJ open, 2016. **6**(8): p. e011127.
16. Sitzia, J., *Barriers to research utilisation: the clinical setting and nurses themselves.* Intensive and Critical Care Nursing, 2002. **18**(4): p. 230-243.
17. Hummers-Pradier, E., et al., *Simply no time? Barriers to GPs' participation in primary health care research.* Family Practice, 2008. **25**(2): p. 105-112.
18. Stewart, R., et al., *The South London and Maudsley NHS Foundation Trust Biomedical Research Centre (SLAM BRC) case register: development and descriptive data.* BMC Psychiatry, 2009. **9**: p. 51.
19. South London and Maudsley NHS Foundation Trust. *Strategic Plan 2014-19 summary.* 2014; Available from: <http://www.slam.nhs.uk/media/313512/Strategic%20Plan%202014-19.pdf>.
20. Personal Social Services Research Unit. *Unit Costs of Health and Social Care 2014* [cited 2017; Available from: <http://www.pssru.ac.uk/project-pages/unit-costs/2014/index.php>.
21. Patel, R., et al., *What proportion of patients with psychosis is willing to take part in research? A mental health electronic case register analysis.* BMJ open, 2017. **7**(3): p. e013113.
22. StataCorp, L., *STATA-IC (Version 12) College Station.* Texas: StatCorp LP, 2011.
23. UCLA: Statistical Consulting Group. *Analysing collrelated (clustered) data.* 2016 [cited 20.16 12.12.16]; Available from: <http://www.ats.ucla.edu/stat/stata/library/cpsu.htm>.
24. Weng, C., et al., *Using EHRs to integrate research with patient care: promises and challenges.* Journal of the American Medical Informatics Association, 2012. **19**(5): p. 684-687.
25. Cheah, S., et al., *Permission to contact (PTC)—a strategy to enhance patient engagement in translational research.* Biopreservation and biobanking, 2013. **11**(4): p. 245-252.

1  
2  
3 ACKNOWLEDGEMENTS  
4

5 We would like to thank the psychosis community teams in SLaM, Mrs Caroline Morris, Mr Abdul  
6 Choudhury and Mr Bartlomiej Pliszka for their contributions to the C4C register and Mr Hitesh Shetty  
7 for advice on data extraction.  
8

9  
10 AUTHOR CONTRIBUTIONS

11 SO, DR, TC and TW conceived the study, SO analysed data and drafted the manuscript with guidance  
12 and input throughout from TC, DR, and TW. All authors offered comments and revisions.  
13

14  
15 COMPETING INTERESTS

16  
17 None declared  
18

19 DATA SHARING

20  
21 No additional data are available.  
22

23 FUNDING

24  
25 The authors would like to acknowledge the support the National Institute for Health Research (NIHR)  
26 Mental Health Biomedical Research Centre at South London and Maudsley NHS Foundation Trust.  
27 The views expressed are those of the authors and not necessarily those of the NHS, the NIHR or the  
28 Department of Health.  
29  
30  
31  
32  
33  
34  
35  
36  
37  
38  
39  
40  
41  
42  
43  
44  
45  
46  
47  
48  
49  
50  
51  
52  
53  
54  
55  
56  
57  
58  
59  
60

## Tables and figures

Table 1: Associations between proportions of patients asked C4C and study group

| Time points | Control                        |                          | Intervention                   |                          | Odds ratios with 95% confidence intervals |               |                                                |              |
|-------------|--------------------------------|--------------------------|--------------------------------|--------------------------|-------------------------------------------|---------------|------------------------------------------------|--------------|
|             | Number of patients on caseload | Percentage Asked C4C (%) | Number of patients on caseload | Percentage Asked C4C (%) | Unadjusted OR                             | 95% CI        | Adj. OR ( <i>adjusted for age and gender</i> ) | 95% CI       |
| T1          | 300                            | 2.7                      | 394                            | 5.1                      | 1.95                                      | 0.63 – 10.31  | 1.71                                           | 0.45 – 10.26 |
| T2          | 301                            | 5.3                      | 355                            | 6.8                      | 1.29                                      | 0.28 – 5.86   | 1.32                                           | 0.32 – 5.39  |
| T3          | 341                            | 15.2                     | 585                            | 40.3                     | 3.75                                      | 2.65 – 5.32*  | 3.78                                           | 2.63– 5.45*  |
| T4          | 392                            | 11.7                     | 657                            | 44.4                     | 6.01                                      | 4.97 – 7.28 * | 5.98                                           | 4.96 – 7.22* |
| T5          | 437                            | 13.3                     | 693                            | 39.3                     | 4.22                                      | 3.01 – 5.90 * | 4.13                                           | 2.94 – 5.79* |

C4C, consent for contact. OR, odds ratios. Adj. OR, adjusted odds ratios. CI, confidence interval. \*p<0.001

Figure 1: Comparison between control and intervention group for the proportion of patients asked C4C

1  
2  
3  
4  
5  
6  
7  
8  
9  
10  
11  
12  
13  
14  
15  
16  
17  
18  
19  
20  
21  
22  
23  
24  
25  
26  
27  
28  
29  
30  
31  
32  
33  
34  
35  
36  
37  
38  
39  
40  
41  
42  
43  
44  
45  
46  
47  
48  
49  
50  
51  
52  
53  
54  
55  
56  
57  
58  
59  
60

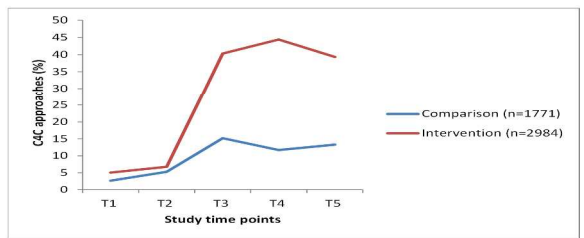

Figure 1: comparison between control and intervention group for the proportion of patients asked C4C.

Figure 1: Comparison between control and intervention group for the proportion of patients asked C4C

254x142mm (300 x 300 DPI)

review only

## STROBE Statement—checklist of items that should be included in reports of observational studies

|                              | Item No | Recommendation                                                                                                                                                                                                                                                                                                                                                                                                                                                                                                                                                                                                                                                                                       | Page No. |
|------------------------------|---------|------------------------------------------------------------------------------------------------------------------------------------------------------------------------------------------------------------------------------------------------------------------------------------------------------------------------------------------------------------------------------------------------------------------------------------------------------------------------------------------------------------------------------------------------------------------------------------------------------------------------------------------------------------------------------------------------------|----------|
| <b>Title and abstract</b>    | 1       | (a) Indicate the study's design with a commonly used term in the title or the abstract<br><br>(b) Provide in the abstract an informative and balanced summary of what was done and what was found                                                                                                                                                                                                                                                                                                                                                                                                                                                                                                    | 1        |
| <b>Introduction</b>          |         |                                                                                                                                                                                                                                                                                                                                                                                                                                                                                                                                                                                                                                                                                                      |          |
| Background/rationale         | 2       | Explain the scientific background and rationale for the investigation being reported                                                                                                                                                                                                                                                                                                                                                                                                                                                                                                                                                                                                                 | 3        |
| Objectives                   | 3       | State specific objectives, including any pre specified hypotheses                                                                                                                                                                                                                                                                                                                                                                                                                                                                                                                                                                                                                                    | 4        |
| <b>Methods</b>               |         |                                                                                                                                                                                                                                                                                                                                                                                                                                                                                                                                                                                                                                                                                                      |          |
| Study design                 | 4       | Present key elements of study design early in the paper                                                                                                                                                                                                                                                                                                                                                                                                                                                                                                                                                                                                                                              | 4        |
| Setting                      | 5       | Describe the setting, locations, and relevant dates, including periods of recruitment, exposure, follow-up, and data collection                                                                                                                                                                                                                                                                                                                                                                                                                                                                                                                                                                      | 4        |
| Participants                 | 6       | (a) <i>Cohort study</i> —Give the eligibility criteria, and the sources and methods of selection of participants. Describe methods of follow-up<br><i>Case-control study</i> —Give the eligibility criteria, and the sources and methods of case ascertainment and control selection. Give the rationale for the choice of cases and controls<br><i>Cross-sectional study</i> —Give the eligibility criteria, and the sources and methods of selection of participants<br><br>(b) <i>Cohort study</i> —For matched studies, give matching criteria and number of exposed and unexposed<br><i>Case-control study</i> —For matched studies, give matching criteria and the number of controls per case | 5        |
| Variables                    | 7       | Clearly define all outcomes, exposures, predictors, potential confounders, and effect modifiers. Give diagnostic criteria, if applicable                                                                                                                                                                                                                                                                                                                                                                                                                                                                                                                                                             | 5/6      |
| Data sources/<br>measurement | 8*      | For each variable of interest, give sources of data and details of methods of assessment (measurement). Describe comparability of assessment methods if there is more than one group                                                                                                                                                                                                                                                                                                                                                                                                                                                                                                                 | 6        |
| Bias                         | 9       | Describe any efforts to address potential sources of bias                                                                                                                                                                                                                                                                                                                                                                                                                                                                                                                                                                                                                                            | 7        |
| Study size                   | 10      | Explain how the study size was arrived at                                                                                                                                                                                                                                                                                                                                                                                                                                                                                                                                                                                                                                                            | 7        |
| Quantitative<br>variables    | 11      | Explain how quantitative variables were handled in the analyses. If applicable, describe which groupings were chosen and why                                                                                                                                                                                                                                                                                                                                                                                                                                                                                                                                                                         | 8        |
| Statistical methods          | 12      | (a) Describe all statistical methods, including those used to control for confounding<br><br>(b) Describe any methods used to examine subgroups and interactions<br><br>(c) Explain how missing data were addressed<br><br>(d) <i>Cohort study</i> —If applicable, explain how loss to follow-up was addressed<br><i>Case-control study</i> —If applicable, explain how matching of cases and controls was addressed<br><i>Cross-sectional study</i> —If applicable, describe analytical methods                                                                                                                                                                                                     | 8        |

taking account of sampling strategy

(e) Describe any sensitivity analyses

Continued on next page

## Results

|                           |     |                                                                                                                                                                                                              |     |
|---------------------------|-----|--------------------------------------------------------------------------------------------------------------------------------------------------------------------------------------------------------------|-----|
| Participants              | 13* | (a) Report numbers of individuals at each stage of study—eg numbers potentially eligible, examined for eligibility, confirmed eligible, included in the study, completing follow-up, and analysed 8          | 8   |
|                           |     | (b) Give reasons for non-participation at each stage                                                                                                                                                         | 9   |
|                           |     | (c) Consider use of a flow diagram                                                                                                                                                                           |     |
| Descriptive data          | 14* | (a) Give characteristics of study participants (eg demographic, clinical, social) and information on exposures and potential confounders                                                                     | 8/9 |
|                           |     | (b) Indicate number of participants with missing data for each variable of interest                                                                                                                          | 9   |
|                           |     | (c) <i>Cohort study</i> —Summarise follow-up time (eg, average and total amount)                                                                                                                             |     |
| Outcome data              | 15* | <i>Cohort study</i> —Report numbers of outcome events or summary measures over time                                                                                                                          |     |
|                           |     | <i>Case-control study</i> —Report numbers in each exposure category, or summary measures of exposure                                                                                                         |     |
|                           |     | <i>Cross-sectional study</i> —Report numbers of outcome events or summary measures                                                                                                                           | 8/9 |
| Main results <sup>9</sup> | 16  | (a) Give unadjusted estimates and, if applicable, confounder-adjusted estimates and their precision (eg, 95% confidence interval). Make clear which confounders were adjusted for and why they were included | 14  |
|                           |     | (b) Report category boundaries when continuous variables were categorized                                                                                                                                    |     |
|                           |     | (c) If relevant, consider translating estimates of relative risk into absolute risk for a meaningful time period                                                                                             |     |
| Other analyses            | 17  | Report other analyses done—eg analyses of subgroups and interactions, and sensitivity analyses                                                                                                               |     |
| <b>Discussion</b>         |     |                                                                                                                                                                                                              |     |
| Key results               | 18  | Summarise key results with reference to study objectives                                                                                                                                                     | 9   |
| Limitations               | 19  | Discuss limitations of the study, taking into account sources of potential bias or imprecision. Discuss both direction and magnitude of any potential bias                                                   | 10  |
| Interpretation            | 20  | Give a cautious overall interpretation of results considering objectives, limitations, multiplicity of analyses, results from similar studies, and other relevant evidence                                   | 10  |
| Generalisability          | 21  | Discuss the generalisability (external validity) of the study results                                                                                                                                        | 11  |
| <b>Other information</b>  |     |                                                                                                                                                                                                              |     |
| Funding                   | 22  | Give the source of funding and the role of the funders for the present study and, if applicable, for the original study on which the present article is based                                                | 13  |

\*Give information separately for cases and controls in case-control studies and, if applicable, for exposed and unexposed groups in cohort and cross-sectional studies.

**Note:** An Explanation and Elaboration article discusses each checklist item and gives methodological background and published examples of transparent reporting. The STROBE checklist is best used in conjunction with this article (freely available on the Web sites of PLoS Medicine at <http://www.plosmedicine.org/>, Annals of Internal Medicine at <http://www.annals.org/>, and Epidemiology at <http://www.epidem.com/>). Information on the STROBE Initiative is available at [www.strobe-statement.org](http://www.strobe-statement.org).

# BMJ Open

## What is the impact of research champions on integrating research in mental health clinical practice? A quasi experimental study in South London, UK.

|                                 |                                                                                                                                                                                                                                                                                                                                              |
|---------------------------------|----------------------------------------------------------------------------------------------------------------------------------------------------------------------------------------------------------------------------------------------------------------------------------------------------------------------------------------------|
| Journal:                        | <i>BMJ Open</i>                                                                                                                                                                                                                                                                                                                              |
| Manuscript ID                   | bmjopen-2017-016107.R2                                                                                                                                                                                                                                                                                                                       |
| Article Type:                   | Research                                                                                                                                                                                                                                                                                                                                     |
| Date Submitted by the Author:   | 13-Jul-2017                                                                                                                                                                                                                                                                                                                                  |
| Complete List of Authors:       | Oduola, Sherifat; King's College London (Institute of Psychiatry), Health Service Population Research; South London and Maudsley NHS Foundation Trust,<br>Wykes, Til; King's College London (Institute of Psychiatry),<br>Robotham, Dan; King's College London, Psychology<br>Craig, Thomas; King's College London (Institute of Psychiatry) |
| <b>Primary Subject Heading</b>: | Mental health                                                                                                                                                                                                                                                                                                                                |
| Secondary Subject Heading:      | Health services research                                                                                                                                                                                                                                                                                                                     |
| Keywords:                       | recruitment, consent, psychosis, research participation, MENTAL HEALTH                                                                                                                                                                                                                                                                       |
|                                 |                                                                                                                                                                                                                                                                                                                                              |

SCHOLARONE™  
Manuscripts

**Title:**

What is the impact of research champions on integrating research in mental health clinical practice?  
A quasi experimental study in South London, UK.

**Authors:**

Sherifat Oduola<sup>1,2</sup>, Til Wykes<sup>3</sup>, Dan Robotham<sup>3</sup>, and Tom K. J. Craig<sup>1</sup>

**Author affiliations**

1. King's College London, Department of Health Service and Population Research, Institute of Psychiatry, Psychology & Neuroscience, De Crespigny Park, Denmark Hill, London SE5 8AF, UK
2. South London and Maudsley NHS Foundation Trust, NIHR Maudsley Biomedical Research Centre Denmark Hill, London SE5 8AZ, UK
3. King's College London, Department of Psychology, Institute of Psychiatry, Psychology & Neuroscience, De Crespigny Park, Denmark Hill, London SE5 8AF, UK

**Correspondence to:**

Sherifat Oduola

Tel: +44 (0) 2078480619

Email: [Sherifat.oduola@kcl.ac.uk](mailto:Sherifat.oduola@kcl.ac.uk)

Word count (excluding abstract, references, tables and figures): 2,658

Key words: recruitment, mental health, consent, psychosis, research participation.

**Abstract**

**Objectives:** Key challenges for mental health healthcare professionals to implement research alongside clinical activity have been highlighted, such as, insufficient time to apply research skills and lack of support and resources. We examined the impact of employing dedicated staff to promote research in community mental health clinical settings.

**Design:** Quasi-experiment before and after study.



1  
2  
3 **Setting:** South London and Maudsley NHS Foundation Trust (SLaM).  
4

5  
6 **Participants:** 4,455 patients receiving care from fifteen community mental health teams between 1<sup>st</sup>  
7  
8 December 2013 and 31<sup>st</sup> December 2014.  
9

10  
11 **Outcome measures:** The proportion of patients approached for research participation in clinical  
12  
13 services where research champions were present (intervention group) and comparison group where  
14  
15 there were no research champions present.  
16

17  
18 **Results:** Patients in the intervention group were nearly six times more likely to be approached for  
19  
20 research participation (Adj. OR=5.98; 95%CI= 4.96 – 7.22).  
21  
22

23  
24 **Conclusions:** Investing in staff that promote and drive research in clinical services increases  
25  
26 opportunities for patients to hear about and engage in clinical research studies. However,  
27  
28 investment needs to move beyond employing short-term staff.  
29

### 30 31 32 **Strengths and limitations of this study** 33

- 34  
35  
36  
37 • The quasi-experimental design enables us to evaluate the relationship between a service-  
38  
39 level intervention and opportunities for patients to hear about, and engage in clinical  
40  
41 research studies.  
42
- 43  
44 • Our study may have been affected by selection bias due to the lack of randomisation.  
45
- 46  
47 • We only considered the impact of the intervention up to six months, therefore we did not  
48  
49 account for trends over a longer period of time that may influence the effect of the  
50  
51 intervention.  
52  
53  
54  
55  
56  
57  
58  
59  
60

## Introduction

In the UK, the National Health Service (NHS) constitution promises to make research accessible to all persons using its services [1]. Yet, there are discrepancies in the level of investment and engagement in research across healthcare providers and patients [2]. Recruitment into mental health research is reported to be more challenging compared with physical health studies [3, 4]. However, the challenge is not solely related to the actual recruitment of participants as emerging evidence suggest that patients are willing to participate in research when they are reassured that their personal information will be kept confidential [5], or they simply take part for altruistic reasons [6].

A good part of the challenge rests on the practical difficulties of getting researchers to meet potential participants. Researchers have to broker meetings with busy clinicians who are relied upon to remember the details of several projects and explain these to their patients. In addition, the modern dispersed mental health service may mean the researcher juggle visits across multiple community clinic sites. The upshot is persistent, if understandable failures to recruit to target and on time [7, 8].

In an attempt to improve existing processes, the South London and Maudsley NHS Trust (SLaM) introduced a system whereby clinical staff are expected to ask all their patients whether they might be interested in approaches from researchers for studies that could be relevant for their condition (Consent for Contact; C4C) and responses ('yes' or 'no') are recorded in electronic health records. These responses form a searchable register through which an investigator can identify potential participants who have given this broad consent to be contacted. The register and C4C system has been described in detail elsewhere [5, 9, 10]. Ultimately, of course, the requirement upon clinicians to take and record consent on patients electronic health records does nothing to address many of the underlying issues including how to balance this activity against the demands of clinical responsibility [11], insufficient time to apply research skill [12, 13], lack of sufficient information to

1  
2  
3 discuss research studies with patients [14, 15], lack of support from managers [16] and not being  
4  
5 recognised as a partner or not having a voice in the research process [17] .  
6  
7  
8  
9

10  
11 In this paper, we addressed the question of whether a short-term investment in dedicated teams  
12  
13 and staff can have a sustained benefit over and above the impact of implementing research as part  
14  
15 of clinical activity through the C4C programme. We assessed the usefulness of employing research  
16  
17 champions (i.e. staff with both clinical and research responsibility). A team-level intervention in  
18  
19 clinical services that focus on psychotic disorders (often regarded as particularly challenging for  
20  
21 research recruitment) could help to tackle some of these fundamental issues as reflected in C4C sign  
22  
23 up i.e. 'yes' or 'no' responses.  
24  
25  
26  
27

## 28 **Methods**

### 29 **Study design and participants**

30  
31 We employed a before and after quasi-experiment design. The study was conducted in four south  
32  
33 London boroughs (Lambeth, Southwark, Croydon and Lewisham) within community mental health  
34  
35 teams serving approximately 4800 people with stable, chronic psychotic disorders at SLaM between  
36  
37 December 2013 and December 2014.  
38  
39  
40  
41  
42

43 SLaM is the largest mental health provider in the UK serving urban and suburban population in  
44  
45 south London and specialist services elsewhere in the UK [18, 19]. Clinical services for psychosis  
46  
47 serve on average 7000+ patients per year and are structured around four service lines based on  
48  
49 different stages of illness from the first episode through continuing care [19]. At the time of the  
50  
51 study, there were 15 case-management community mental health teams providing continuing care  
52  
53 for people with stable, chronic psychotic disorder in the Trust.  
54  
55  
56  
57  
58  
59  
60

1  
2  
3 In this study and as demonstrated by Callard and colleagues [9], individuals were recruited to a  
4  
5 research register so that researchers can invite them to research studies.  
6  
7  
8  
9

## 10 11 **Procedure and team allocation**

### 12 13 14 **Recruitment as usual**

15 The procedures for implementing the C4C model are provided in a previous paper [9]. In brief, C4C  
16  
17 was set up as part of clinical activities whereby healthcare professionals routinely ask their patients  
18  
19 whether they might be interested in being contacted about relevant research opportunities. To  
20  
21 support the implementation, a dedicated team of clinicians and project workers referred to as 'C4C  
22  
23 implementation team' coordinated C4C activities across SLaM. All teams across the trust have  
24  
25 attended an ongoing promotional campaign that raises awareness of C4C among service users and  
26  
27 staff, including posters with information about how interested patients might get involved in  
28  
29 research and C4C. A short film which describes the concept and process of C4C tailored to staff and  
30  
31 patients is also widely available via the Trust intranet page and public-facing internet. The C4C  
32  
33 implementation team also holds an annual one-day event on 20th May to acknowledge and  
34  
35 celebrate the International Clinical Trials Day (National Institute for Health Research 2014). C4C stalls  
36  
37 are held across the main hospital sites of SLaM on the day. The aims of the day are to raise  
38  
39 awareness of the importance and benefit of research, showcase some of the research studies  
40  
41 currently running within the organisation and invite service users to sign up for C4C. Clinicians are  
42  
43 required to ask a proportion of patients on their caseload per month, which is regularly reviewed  
44  
45 and discussed in team meetings. Patients' agreement (or refusal) to join the C4C register is primarily  
46  
47 sought by their clinicians as part of routine clinical contacts. Patients' responses are recorded  
48  
49 electronically in their electronic health records (EHR).  
50  
51  
52  
53  
54  
55  
56  
57  
58  
59  
60

1  
2  
3 For the present study, community teams providing services to people suffering from psychotic  
4 disorders were invited to apply for additional funding in order to employ research champions to  
5 work in each borough.  
6  
7  
8

9  
10 Of the four boroughs, clinical services in two boroughs (Southwark and Lewisham) took up the  
11 opportunity to employ research champions in addition to C4C recruitment as usual and are referred  
12 to here as the intervention group. The remaining two boroughs had C4C recruitment as usual only  
13 and are referred to as comparison group.  
14  
15  
16  
17  
18

### 19 20 21 22 **Intervention**

23  
24 The intervention involved research champions (RCs) working within clinical services specifically to  
25 discuss research participation with patients and record those who are interested (and consented) or  
26 refused onto the (EHR). There were ten clinical teams in the intervention group. The RCs role was  
27 advertised internally across the intervention teams as a secondment opportunity. In identifying the  
28 RCs, a number of key essential requirements were assessed including: clinical qualification e.g.  
29 nursing, social work or occupational therapy; extensive clinical experience; broad knowledge of  
30 mental disorders and treatment models; excellent communications, computer and organisational  
31 skills. These qualities were assessed in an interview. Two nurses were employed as RCs; they were  
32 allocated to spend two weeks in each intervention team at 37.5hrs per week. An average unit cost  
33 of £35 per hour for the year 2013/14 was used to estimate the cost per RC [20] during the  
34 intervention period, therefore a total of £26,250 was invested in both RCs. RCs attended one day  
35 training on how to engage patients in C4C before undertaking the task of recruiting and signing up  
36 patients. They also had training in research governance particularly regarding informed consent and  
37 assessment of mental capacity to provide consent. RCs were supervised by the clinical team leaders  
38 and C4C project manager during their allocation to each intervention team.  
39  
40  
41  
42  
43  
44  
45  
46  
47  
48  
49  
50  
51  
52  
53  
54  
55  
56  
57  
58  
59  
60

1  
2  
3 The role of RCs involved actively having conversations about research and explaining research  
4 participation (C4C) to patients and recording their response ('yes' or 'no') in the electronic health  
5 records. RCs also encouraged other healthcare professionals in each team to discuss research  
6 participation with patients, for example, when they visited patients at home. Consent or refusal was  
7 recorded in patients EHRs by RCs and other clinicians in the teams. In addition, RCs played the role of  
8 'go-to- person' within the teams, such that team members could direct questions or issues about  
9 research participation to them. Placement of RCs in the intervention teams took place between 1st  
10 March and 30th June 2014.

### 21 Source of data

22  
23 Data were drawn from the Maudsley Biomedical Research Centre (BRC) Clinical Records Interactive  
24 Search tool (CRIS) [18]. Briefly, CRIS provides a daily updated, anonymised copy of the Trust's  
25 electronic clinical record. The C4C model is embedded as a clinical activity and so consent or refusal  
26 to join the C4C register is recorded on these electronic case records and thus searchable through  
27 CRIS.

### 35 Data collection and analysis

#### 38 Inclusion criteria

39  
40 Patients were included if they were active in and receiving care from participating community  
41 mental health teams at specific time points (T) as follow:

42  
43  
44  
45 T1 = 3 month before intervention (1st Dec 2013)

46  
47  
48 T2 = Start of intervention (1 March 2014)

49  
50  
51 T3 = End of intervention (30 June 2014)

52  
53  
54 T4 = 3 months post intervention (30 Sep 2014)

55  
56  
57 T5 = 6 months post intervention (31 Dec 2014)

## Outcome measures

The primary outcome measure was the proportion of patients recorded as having been approached for research participation at each time point. This measure was chosen as the primary outcome as it characterises the success and uptake of C4C and it is a robust assessment of impact of the intervention. Furthermore, a number of previous studies have also used the proportion of C4C approaches as primary outcome measure [15, 21]. From CRIS, we identified and extracted information for teams included in the study as independent variables and the proportion of patients on the team caseload who were asked about C4C as binary outcome variable. Socio-demographic information (gender and age) were collected at patient level as covariates for logistic regression analysis.

Data were analysed using STATA version 12 [22]. Chi-squared tests were used to compare proportion of C4C approaches in intervention and comparison groups by time-point. Binary logistic regression models were applied to assess associations between patients approached for C4C and study arm (comparison vs. intervention group) with and without adjusting for demographic factors. Since our primary sampling unit was the participating teams, the *cluster (team)* option was specified for the logistic regression models in STATA. This provides robust estimates of standard errors and the approach is recommended when data is drawn from units within a population[23]

## Ethical approval

The SLaM BRC Clinical Register Interactive Search System (CRIS) was approved as an anonymised dataset for secondary analysis by the Oxfordshire Research Ethics Committee (reference 08/H0606/71) for mental health research [18]. A local permission was obtained from a service user-led oversight committee (reference CRIS- 920) which provides governance for and monitor all projects conducted using the SLaM CRIS. The SLaM C4C model was reviewed and approved by the

1  
2  
3 National Information Governance Board for Health and Social Care (NIGB, now known as  
4  
5 Confidential Advisory Group) and Ethics and Confidential committee (reference ECC 2—08/2010).  
6  
7  
8  
9

## 10 11 12 **Results**

### 13 14 15 **Consent for contact approaches**

16  
17  
18 In total, fifteen community mental health teams participated in the study (10 in intervention  
19  
20 (n=2684); 5 in comparison (n=1771) group). A total of 4,455 patients were receiving care across the  
21  
22 teams during the study period. Mean age was 45.7 (SD=11.9) years. There were 1871 women (756 in  
23  
24 comparison and 1115 in intervention group) and 2584 men (1014 in comparison; 1570 in  
25  
26 intervention group). There were no differences in the number of asked C4C, by gender (men 31.3%;  
27  
28 women 31.7%  $\chi^2 = 0.05$ ,  $df = 1$   $p=0.82$ ); or by age (mean 46.6; 95% CI = 45.90 – 47.43,  $p = 0.24$ ).  
29  
30 Thirty-nine patients were discharged from the intervention group between T1 and T2. There were  
31  
32 no recorded patient discharges in the comparison group during the study period.  
33  
34

35  
36 [Insert Table 1 and Figure 1]  
37

38  
39 Table 1 shows the breakdown of patients active to teams in the intervention and comparison groups  
40  
41 who were recorded as having been approached for C4C by study time-point along with 95%  
42  
43 confidence intervals (CI). There were no significant differences between intervention and  
44  
45 comparison groups before intervention (T1) and at start of intervention (T2), although the  
46  
47 intervention group were slightly ahead in approaching patients for C4C. While recruitment rose  
48  
49 across both groups, at T3, it was greatest in the intervention group as patients were nearly four  
50  
51 times more likely to be asked C4C (adj. OR=3.78; 95%CI= 2.63 – 5.45,  $p<0.001$ ). The evidence was  
52  
53 stronger and sustained three months later at T4 when patients were six times more likely to be  
54  
55 asked (adj. OR= adj. OR= 5.98; 95% CI= 1.96 – 7.22,  $p<0.001$ ). The association of increased likelihood  
56  
57  
58  
59  
60



1  
2  
3 of being asked C4C remained robust in the intervention group at six month post intervention (adj.  
4  
5 OR=4.13, 95% CI =2.93 – 5.79, p<0.001) at T5. Figure 1 displays a graphical illustration of the  
6  
7 difference between comparison and intervention groups across the study time points.  
8  
9

## 10 11 12 13 14 **Discussion**

### 15 16 17 **Main findings**

18 The research champion intervention had a positive and sustained impact on the proportion of  
19  
20 patients asked about consent for contact compared to recruitment as usual.  
21  
22

23  
24 During the three months before the intervention, the lack for difference between our two groups  
25  
26 suggests that there were no substantial differences in the C4C activity prior to the recruitment of  
27  
28 research champions. Similarly, we did not observe any differences among patients who were  
29  
30 approached for C4C in the intervention or control groups by gender or age. Another study also found  
31  
32 no gender differences [21].  
33  
34

35  
36 Evidence of change was demonstrated immediately after the intervention and sustained up to six  
37  
38 months later. This reflects that given the space, time and resources, research and clinical  
39  
40 responsibilities can be aligned [6, 17, 24].  
41  
42

43 The observed growth in the comparison group overtime supports previous findings that suggest C4C  
44  
45 is an acceptable infrastructure for research recruitment [5, 9]. However, the slight drop (4%) in  
46  
47 proportion of patients approached in the intervention group at six month may hint at washout effect  
48  
49 of end of research champions' placement. This may reinforce the previously reported insufficient  
50  
51 resources and support to devote time to research [13, 16]. The evidence from the present study  
52  
53 suggests that implementation of research as part of clinical activity requires strategies beyond  
54  
55 raising awareness.  
56  
57  
58  
59  
60

## Strengths and limitations

A number of research studies have investigated factors associated with participating in consent for contact [10, 25]. However, this is the first study to report on relationship between service-level intervention and being approached for C4C. One of the strengths therefore, is that we were able to extract data on 4,455 patients at team and individual level to investigate impact of service related intervention in facilitating research recruitment. Further, the availability of data on number of patients approached for C4C at different time points increased our ability to detect the full impact of the intervention. Although we did not carry out a cost-benefit analysis, using a nationally published unit cost [20] of community based mental health nurse provides a financial implication of the investment in our intervention group, which is a useful resource for investment especially in a time of cost saving. In addition, our finding of increased proportion of patients approached for C4C in the intervention group is consistent with previous studies [21, 26]

A key limitation of this study is the lack of randomisation that may have led to the introduction of bias. The most obvious is the possibility that the teams who took up the opportunity of additional funding were also those most interested in helping research. We have assumed that all persons receiving care within the participating teams would be asked about participating in research, our study may still suffer selection bias as it is likely that clinicians may have approached higher functioning patients [21] who may be more likely to attend appointments at clinics and therefore have more opportunity to see the research champions. Another limitation is that we only considered assessment of the intervention up to six months, therefore we have not accounted for trends over a longer period of time that may influence the effect of the intervention.

## Conclusion

This study highlights some key issues in integrating research as part of clinical activity across mental health services with implication for future development. Our results suggest that investing in clinicians that promote research in clinical services increases opportunities for patients to hear

about and engage in clinical research studies and may be an important early step in getting systems such as C4C implemented. However, investment needs to move beyond employing short-term staff.

## References

1. Department of Health, *The NHS Constitution the NHS belongs to us all*. 2013, HM Crown: London.
2. Wykes, T., et al., *Mental health research priorities for Europe*. The Lancet Psychiatry, 2015. **2**(11): p. 1036-1042.
3. Patel, M.X., V. Doku, and L. Tennakoon, *Challenges in recruitment of research participants*. Advances in Psychiatric Treatment, 2003. **9**(3): p. 229-238.
4. Howard, L., et al., *Why is recruitment to trials difficult? An investigation into recruitment difficulties in an RCT of supported employment in patients with severe mental illness*. Contemporary Clinical Trials, 2009. **30**(1): p. 40-46.
5. Robotham, D., et al., *Consenting for contact? Linking electronic health records to a research register within psychosis services, a mixed method study*. BMC health services research, 2015. **15**(1): p. 1.
6. Adams, M., L. Caffrey, and C. McKeivitt, *Barriers and opportunities for enhancing patient recruitment and retention in clinical research: findings from an interview study in an NHS academic health science centre*. Health research policy and systems, 2015. **13**(1): p. 8.
7. McDonald, A.M., et al., *What influences recruitment to randomised controlled trials? A review of trials funded by two UK funding agencies*. Trials, 2006. **7**(1): p. 1.
8. NIHR Clinical Research Network. *Our Performance*. 2017; Available from: <https://www.nihr.ac.uk/about-us/how-we-are-managed/managing-centres/crn/our-performance.htm>.
9. Callard, F., et al., *Developing a new model for patient recruitment in mental health services: a cohort study using Electronic Health Records*. BMJ Open, 2014. **4**(12): p. e005654.
10. Papoulias, C., et al., *Staff and service users' views on a 'Consent for Contact' research register within psychosis services: a qualitative study*. BMC psychiatry, 2014. **14**(1): p. 377.
11. Borschmann, R., et al., *Influences on recruitment to randomised controlled trials in mental health settings in England: a national cross-sectional survey of researchers working for the Mental Health Research Network*. BMC medical research methodology, 2014. **14**(1): p. 1.
12. Retsas, A. and M. Nolan, *Barriers to nurses' use of research: an Australian hospital study*. International Journal of Nursing Studies, 1999. **36**(4): p. 335-343.
13. Happell, B. and T. Martin, *Changing the culture of mental health nursing: the contribution of nursing clinical development units*. Issues Ment Health Nurs, 2005. **26**(9): p. 921-33.
14. Bryar, R.M., et al., *The Yorkshire BARRIERS project: diagnostic analysis of barriers to research utilisation*. International Journal of Nursing Studies, 2003. **40**(1): p. 73-84.
15. Robotham, D., et al., *Facilitating mental health research for patients, clinicians and researchers: a mixed-method study*. BMJ open, 2016. **6**(8): p. e011127.
16. Sitzia, J., *Barriers to research utilisation: the clinical setting and nurses themselves*. Intensive and Critical Care Nursing, 2002. **18**(4): p. 230-243.
17. Hummers-Pradier, E., et al., *Simply no time? Barriers to GPs' participation in primary health care research*. Family Practice, 2008. **25**(2): p. 105-112.
18. Stewart, R., et al., *The South London and Maudsley NHS Foundation Trust Biomedical Research Centre (SLAM BRC) case register: development and descriptive data*. BMC Psychiatry, 2009. **9**: p. 51.
19. South London and Maudsley NHS Foundation Trust. *Strategic Plan 2014-19 summary*. 2014; Available from: <http://www.slam.nhs.uk/media/313512/Strategic%20Plan%202014-19.pdf>.

20. Personal Social Services Research Unit. *Unit Costs of Health and Social Care 2014* [cited 2017; Available from: <http://www.pssru.ac.uk/project-pages/unit-costs/2014/index.php>.
21. Patel, R., et al., *What proportion of patients with psychosis is willing to take part in research? A mental health electronic case register analysis*. *BMJ open*, 2017. **7**(3): p. e013113.
22. StataCorp, L., *STATA-IC (Version 12) College Station*. Texas: StatCorp LP, 2011.
23. UCLA: Statistical Consulting Group. *Analysing collrelated (clustered) data*. 2016 [cited 20.16 12.12.16]; Available from: <http://www.ats.ucla.edu/stat/stata/library/cpsu.htm>.
24. Weng, C., et al., *Using EHRs to integrate research with patient care: promises and challenges*. *Journal of the American Medical Informatics Association*, 2012. **19**(5): p. 684-687.
25. Robotham, D., et al., *Linking a research register to clinical records in older adults' mental health services: a mixed-methods study*. *Alzheimer's research & therapy*, 2015. **7**(1): p. 15.
26. Cheah, S., et al., *Permission to contact (PTC)—a strategy to enhance patient engagement in translational research*. *Biopreservation and biobanking*, 2013. **11**(4): p. 245-252.

#### ACKNOWLEDGEMENTS

We would like to thank the psychosis community teams in SLaM, Mrs Caroline Morris, Mr Abdul Choudhury and Mr Bartlomiej Pliszka for their contributions to the C4C register and Mr Hitesh Shetty for advice on data extraction.

#### AUTHOR CONTRIBUTIONS

SO, DR, TC and TW conceived the study, SO analysed data and drafted the manuscript with guidance and input throughout from TC, DR, and TW. All authors offered comments and revisions.

#### COMPETING INTERESTS

None declared

#### DATA SHARING

No additional data are available.

#### FUNDING

The authors would like to acknowledge the support the National Institute for Health Research (NIHR) Mental Health Biomedical Research Centre at South London and Maudsley NHS Foundation Trust. The views expressed are those of the authors and not necessarily those of the NHS, the NIHR or the Department of Health.

1  
2  
3  
4  
5  
6  
7  
8  
9  
10  
11  
12  
13  
14  
15  
16  
17  
18  
19  
20  
21  
22  
23  
24  
25  
26  
27  
28  
29  
30  
31  
32  
33  
34  
35  
36  
37  
38  
39  
40  
41  
42  
43  
44  
45  
46  
47  
48  
49  
50  
51  
52  
53  
54  
55  
56  
57  
58  
59  
60

For peer review only

1  
2  
3  
4  
5  
6  
7  
8  
9  
10  
11  
12  
13  
14  
15  
16  
17  
18  
19  
20  
21  
22  
23  
24  
25  
26  
27  
28  
29  
30  
31  
32  
33  
34  
35  
36  
37  
38  
39  
40  
41  
42  
43  
44  
45  
46  
47  
48  
49

Tables and figures

Table 1: Associations between proportions of patients asked C4C and study group

| Time points | Control                        |                          | Intervention                   |                          | Odds ratios with 95% confidence intervals |               |                                       |              |
|-------------|--------------------------------|--------------------------|--------------------------------|--------------------------|-------------------------------------------|---------------|---------------------------------------|--------------|
|             | Number of patients on caseload | Percentage Asked C4C (%) | Number of patients on caseload | Percentage Asked C4C (%) | Unadjusted OR                             | 95% CI        | Adj. OR (adjusted for age and gender) | 95% CI       |
| T1          | 300                            | 2.7                      | 394                            | 5.1                      | 1.95                                      | 0.63 – 10.31  | 1.71                                  | 0.45 – 10.26 |
| T2          | 301                            | 5.3                      | 355                            | 6.8                      | 1.29                                      | 0.28 – 5.86   | 1.32                                  | 0.32 – 5.39  |
| T3          | 341                            | 15.2                     | 585                            | 40.3                     | 3.75                                      | 2.65 – 5.32*  | 3.78                                  | 2.63– 5.45*  |
| T4          | 392                            | 11.7                     | 657                            | 44.4                     | 6.01                                      | 4.97 – 7.28 * | 5.98                                  | 4.96 – 7.22* |
| T5          | 437                            | 13.3                     | 693                            | 39.3                     | 4.22                                      | 3.01 – 5.90 * | 4.13                                  | 2.94 – 5.79* |

C4C, consent for contact. OR, odds ratios. Adj. OR, adjusted odds ratios. CI, confidence interval. \*p<0.001

Figure 1: Comparison between control and intervention group for the proportion of patients asked C4C

1  
2  
3  
4  
5  
6  
7  
8  
9  
10  
11  
12  
13  
14  
15  
16  
17  
18  
19  
20  
21  
22  
23  
24  
25  
26  
27  
28  
29  
30  
31  
32  
33  
34  
35  
36  
37  
38  
39  
40  
41  
42  
43  
44  
45  
46  
47  
48  
49  
50  
51  
52  
53  
54  
55  
56  
57  
58  
59  
60

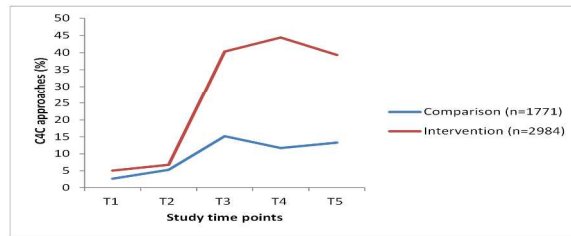

Figure 1: comparison between control and intervention group for the proportion of patients asked C4C.

Figure 1: Comparison between control and intervention group for the proportion of patients asked C4C

254x142mm (300 x 300 DPI)

review only

## STROBE Statement—checklist of items that should be included in reports of observational studies

|                              | Item No | Recommendation                                                                                                                                                                                                                                                                                                                                                                                                                                                                                                                                                                                                                                                                                       | Page No. |
|------------------------------|---------|------------------------------------------------------------------------------------------------------------------------------------------------------------------------------------------------------------------------------------------------------------------------------------------------------------------------------------------------------------------------------------------------------------------------------------------------------------------------------------------------------------------------------------------------------------------------------------------------------------------------------------------------------------------------------------------------------|----------|
| <b>Title and abstract</b>    | 1       | (a) Indicate the study's design with a commonly used term in the title or the abstract<br><br>(b) Provide in the abstract an informative and balanced summary of what was done and what was found                                                                                                                                                                                                                                                                                                                                                                                                                                                                                                    | 1        |
| <b>Introduction</b>          |         |                                                                                                                                                                                                                                                                                                                                                                                                                                                                                                                                                                                                                                                                                                      |          |
| Background/rationale         | 2       | Explain the scientific background and rationale for the investigation being reported                                                                                                                                                                                                                                                                                                                                                                                                                                                                                                                                                                                                                 | 3        |
| Objectives                   | 3       | State specific objectives, including any pre specified hypotheses                                                                                                                                                                                                                                                                                                                                                                                                                                                                                                                                                                                                                                    | 4        |
| <b>Methods</b>               |         |                                                                                                                                                                                                                                                                                                                                                                                                                                                                                                                                                                                                                                                                                                      |          |
| Study design                 | 4       | Present key elements of study design early in the paper                                                                                                                                                                                                                                                                                                                                                                                                                                                                                                                                                                                                                                              | 4        |
| Setting                      | 5       | Describe the setting, locations, and relevant dates, including periods of recruitment, exposure, follow-up, and data collection                                                                                                                                                                                                                                                                                                                                                                                                                                                                                                                                                                      | 4        |
| Participants                 | 6       | (a) <i>Cohort study</i> —Give the eligibility criteria, and the sources and methods of selection of participants. Describe methods of follow-up<br><i>Case-control study</i> —Give the eligibility criteria, and the sources and methods of case ascertainment and control selection. Give the rationale for the choice of cases and controls<br><i>Cross-sectional study</i> —Give the eligibility criteria, and the sources and methods of selection of participants<br><br>(b) <i>Cohort study</i> —For matched studies, give matching criteria and number of exposed and unexposed<br><i>Case-control study</i> —For matched studies, give matching criteria and the number of controls per case | 5        |
| Variables                    | 7       | Clearly define all outcomes, exposures, predictors, potential confounders, and effect modifiers. Give diagnostic criteria, if applicable                                                                                                                                                                                                                                                                                                                                                                                                                                                                                                                                                             | 5/6      |
| Data sources/<br>measurement | 8*      | For each variable of interest, give sources of data and details of methods of assessment (measurement). Describe comparability of assessment methods if there is more than one group                                                                                                                                                                                                                                                                                                                                                                                                                                                                                                                 | 6        |
| Bias                         | 9       | Describe any efforts to address potential sources of bias                                                                                                                                                                                                                                                                                                                                                                                                                                                                                                                                                                                                                                            | 7        |
| Study size                   | 10      | Explain how the study size was arrived at                                                                                                                                                                                                                                                                                                                                                                                                                                                                                                                                                                                                                                                            | 7        |
| Quantitative<br>variables    | 11      | Explain how quantitative variables were handled in the analyses. If applicable, describe which groupings were chosen and why                                                                                                                                                                                                                                                                                                                                                                                                                                                                                                                                                                         | 8        |
| Statistical methods          | 12      | (a) Describe all statistical methods, including those used to control for confounding<br><br>(b) Describe any methods used to examine subgroups and interactions<br><br>(c) Explain how missing data were addressed<br><br>(d) <i>Cohort study</i> —If applicable, explain how loss to follow-up was addressed<br><i>Case-control study</i> —If applicable, explain how matching of cases and controls was addressed<br><i>Cross-sectional study</i> —If applicable, describe analytical methods                                                                                                                                                                                                     | 8        |



taking account of sampling strategy

(e) Describe any sensitivity analyses

Continued on next page

## Results

|                           |     |                                                                                                                                                                                                              |     |
|---------------------------|-----|--------------------------------------------------------------------------------------------------------------------------------------------------------------------------------------------------------------|-----|
| Participants              | 13* | (a) Report numbers of individuals at each stage of study—eg numbers potentially eligible, examined for eligibility, confirmed eligible, included in the study, completing follow-up, and analysed 8          | 8   |
|                           |     | (b) Give reasons for non-participation at each stage                                                                                                                                                         | 9   |
|                           |     | (c) Consider use of a flow diagram                                                                                                                                                                           |     |
| Descriptive data          | 14* | (a) Give characteristics of study participants (eg demographic, clinical, social) and information on exposures and potential confounders                                                                     | 8/9 |
|                           |     | (b) Indicate number of participants with missing data for each variable of interest                                                                                                                          | 9   |
|                           |     | (c) <i>Cohort study</i> —Summarise follow-up time (eg, average and total amount)                                                                                                                             |     |
| Outcome data              | 15* | <i>Cohort study</i> —Report numbers of outcome events or summary measures over time                                                                                                                          |     |
|                           |     | <i>Case-control study</i> —Report numbers in each exposure category, or summary measures of exposure                                                                                                         |     |
|                           |     | <i>Cross-sectional study</i> —Report numbers of outcome events or summary measures                                                                                                                           | 8/9 |
| Main results <sup>9</sup> | 16  | (a) Give unadjusted estimates and, if applicable, confounder-adjusted estimates and their precision (eg, 95% confidence interval). Make clear which confounders were adjusted for and why they were included | 14  |
|                           |     | (b) Report category boundaries when continuous variables were categorized                                                                                                                                    |     |
|                           |     | (c) If relevant, consider translating estimates of relative risk into absolute risk for a meaningful time period                                                                                             |     |
| Other analyses            | 17  | Report other analyses done—eg analyses of subgroups and interactions, and sensitivity analyses                                                                                                               |     |
| <b>Discussion</b>         |     |                                                                                                                                                                                                              |     |
| Key results               | 18  | Summarise key results with reference to study objectives                                                                                                                                                     | 9   |
| Limitations               | 19  | Discuss limitations of the study, taking into account sources of potential bias or imprecision. Discuss both direction and magnitude of any potential bias                                                   | 10  |
| Interpretation            | 20  | Give a cautious overall interpretation of results considering objectives, limitations, multiplicity of analyses, results from similar studies, and other relevant evidence                                   | 10  |
| Generalisability          | 21  | Discuss the generalisability (external validity) of the study results                                                                                                                                        | 11  |
| <b>Other information</b>  |     |                                                                                                                                                                                                              |     |
| Funding                   | 22  | Give the source of funding and the role of the funders for the present study and, if applicable, for the original study on which the present article is based                                                | 13  |

\*Give information separately for cases and controls in case-control studies and, if applicable, for exposed and unexposed groups in cohort and cross-sectional studies.

**Note:** An Explanation and Elaboration article discusses each checklist item and gives methodological background and published examples of transparent reporting. The STROBE checklist is best used in conjunction with this article (freely available on the Web sites of PLoS Medicine at <http://www.plosmedicine.org/>, Annals of Internal Medicine at <http://www.annals.org/>, and Epidemiology at <http://www.epidem.com/>). Information on the STROBE Initiative is available at [www.strobe-statement.org](http://www.strobe-statement.org).
